# Supplementary material for: Four New Anthraquinones with Histone Deacetylase Inhibitory Activity from Ventilago denticulata Roots
Source: MDPI journal article supplement (doi:10.3390/molecules27031088), 2022-02-06
Supplement: s1 [file s1]

## SUPPLEMENTARY MATERIAL

# Four New Anthraquinones with Histone Deacetylase Inhibitory Activity from *Ventilago denticulata* Roots

Nattika Hangsamai <sup>1</sup>, Kanokwan Photai <sup>1</sup>, Thidathep Mahaamnart <sup>1</sup>, Somdej Kanokmedhakul <sup>1</sup>,  
Kwanjai Kanokmedhakul <sup>1</sup>, Thanaset Senawong <sup>2</sup>, Siripit Pitchuanchom <sup>3</sup> and Mongkol  
Nontakitticharoen <sup>1,\*</sup>

<sup>1</sup> Natural Products Research Unit, Department of Chemistry and Center of Excellence for Innovation in Chemistry, Faculty of Science, Khon Kaen University, Khon Kaen 40002, Thailand; nattika\_h@kkumail.com (N.H.); kanokwan\_kp@kkumail.com (K.P.); m\_thidathep@kkumail.com (T.M.); somdej@kku.ac.th (S.K.); kwanjai@kku.ac.th (K.K.)

<sup>2</sup> Natural Products Unit, Department of Biochemistry, Faculty of Science, Khon Kaen University, Khon Kaen 40002, Thailand; sthanaset@kku.ac.th

<sup>3</sup> Department of Chemistry and Center of Excellence for Innovation in Chemistry, Faculty of Science, Mahasarakham University, Maha Sarakham 44150, Thailand; siripit.p@msu.ac.th

\* Correspondence: mongbu@kku.ac.th; Tel.: +66 43-009-700 ext 42174

## Contents:

|                                                                                                        | Page |
|--------------------------------------------------------------------------------------------------------|------|
| <b>Figure S1.</b> $^1\text{H}$ NMR (400 MHz, $\text{CDCl}_3$ ) spectrum of compound <b>1</b>           | 4    |
| <b>Figure S2.</b> $^{13}\text{C}$ NMR (100 MHz, $\text{CDCl}_3$ ) spectrum of compound <b>1</b>        | 4    |
| <b>Figure S3.</b> COSY ( $\text{CDCl}_3$ ) spectrum of compound <b>1</b>                               | 5    |
| <b>Figure S4.</b> HSQC ( $\text{CDCl}_3$ ) spectrum of compound <b>1</b>                               | 5    |
| <b>Figure S5.</b> HMBC ( $\text{CDCl}_3$ ) spectrum of compound <b>1</b>                               | 6    |
| <b>Figure S6.</b> NOESY ( $\text{CDCl}_3$ ) spectrum of compound <b>1</b>                              | 6    |
| <b>Figure S7.</b> MS spectrum of compound <b>1</b>                                                     | 7    |
| <b>Figure S8.</b> $^1\text{H}$ NMR (400 MHz, $\text{CDCl}_3$ ) spectrum of compound <b>2</b>           | 7    |
| <b>Figure S9.</b> $^{13}\text{C}$ NMR (400 MHz, $\text{CDCl}_3$ ) spectrum of compound <b>2</b>        | 8    |
| <b>Figure S10.</b> COSY ( $\text{CDCl}_3$ ) spectrum of compound <b>2</b>                              | 8    |
| <b>Figure S11.</b> HSQC ( $\text{CDCl}_3$ ) spectrum of compound <b>2</b>                              | 9    |
| <b>Figure S12.</b> HMBC ( $\text{CDCl}_3$ ) spectrum of compound <b>2</b>                              | 9    |
| <b>Figure S13.</b> NOESY ( $\text{CDCl}_3$ ) spectrum of compound <b>2</b>                             | 10   |
| <b>Figure S14.</b> MS spectrum of compound <b>2</b>                                                    | 10   |
| <b>Figure S15.</b> $^1\text{H}$ NMR (400 MHz, $\text{CDCl}_3$ ) spectrum of compound <b>3</b>          | 11   |
| <b>Figure S16.</b> $^{13}\text{C}$ NMR (100 MHz, $\text{CDCl}_3$ ) spectrum of compound <b>3</b>       | 11   |
| <b>Figure S17.</b> COSY ( $\text{CDCl}_3$ ) spectrum of compound <b>3</b>                              | 12   |
| <b>Figure S18.</b> HSQC ( $\text{CDCl}_3$ ) spectrum of compound <b>3</b>                              | 12   |
| <b>Figure S19.</b> HMBC ( $\text{CDCl}_3$ ) spectrum of compound <b>3</b>                              | 13   |
| <b>Figure S20.</b> NOESY ( $\text{CDCl}_3$ ) spectrum of compound <b>3</b>                             | 13   |
| <b>Figure S21.</b> MS spectrum of compound <b>3</b>                                                    | 14   |
| <b>Figure S22.</b> $^1\text{H}$ NMR (400 MHz, $\text{CDCl}_3$ ) spectrum of compound <b>4</b>          | 14   |
| <b>Figure S23.</b> $^{13}\text{C}$ NMR (100 MHz, $\text{CDCl}_3$ ) spectrum of compound <b>4</b>       | 15   |
| <b>Figure S23.</b> COSY ( $\text{CDCl}_3$ ) spectrum of compound <b>4</b>                              | 15   |
| <b>Figure S25.</b> HSQC ( $\text{CDCl}_3$ ) spectrum of compound <b>4</b>                              | 16   |
| <b>Figure S26.</b> HMBC ( $\text{CDCl}_3$ ) spectrum of compound <b>4</b>                              | 16   |
| <b>Figure S27.</b> NOESY ( $\text{CDCl}_3$ ) spectrum of compound <b>4</b>                             | 17   |
| <b>Figure S28.</b> MS spectrum of compound <b>4</b>                                                    | 17   |
| <b>Figure S29.</b> $^1\text{H}$ NMR (400 MHz, $\text{CDCl}_3$ ) spectrum of 7-Methoxyphyscion <b>5</b> | 18   |

|                                                                                                                         |    |
|-------------------------------------------------------------------------------------------------------------------------|----|
| <b>Figure S30.</b> $^{13}\text{C}$ NMR (100 MHz, $\text{CDCl}_3$ ) spectrum of 7-Methoxyphyscion <b>5</b>               | 18 |
| <b>Figure S31.</b> MS spectrum of 7-Methoxyphyscion <b>5</b>                                                            | 19 |
| <b>Figure S32.</b> $^1\text{H}$ NMR (400 MHz, $\text{CDCl}_3$ ) spectrum of Physcion <b>6</b>                           | 19 |
| <b>Figure S33.</b> $^{13}\text{C}$ NMR (100 MHz, $\text{CDCl}_3$ ) spectrum of Physcion <b>6</b>                        | 20 |
| <b>Figure S34.</b> MS spectrum of Physcion <b>6</b>                                                                     | 20 |
| <b>Figure S35.</b> $^1\text{H}$ NMR (400 MHz, $\text{CDCl}_3$ ) spectrum of Chrysophanol <b>7</b>                       | 21 |
| <b>Figure S36.</b> $^{13}\text{C}$ NMR (100 MHz, $\text{CDCl}_3$ ) spectrum of Chrysophanol <b>7</b>                    | 21 |
| <b>Figure S37.</b> MS spectrum of Chrysophanol <b>7</b>                                                                 | 22 |
| <b>Figure S38.</b> $^1\text{H}$ NMR (400 MHz, $\text{CDCl}_3$ ) spectrum of 2-Methoxychrysophanol <b>8</b>              | 22 |
| <b>Figure S39.</b> $^{13}\text{C}$ NMR (100 MHz, $\text{CDCl}_3$ ) spectrum of 2-Methoxychrysophanol <b>8</b>           | 23 |
| <b>Figure S40.</b> $^1\text{H}$ NMR (400 MHz, $\text{CDCl}_3+\text{CD}_3\text{OD}$ ) spectrum of Emodin <b>9</b>        | 23 |
| <b>Figure S41.</b> $^{13}\text{C}$ NMR (100 MHz, $\text{CDCl}_3+\text{CD}_3\text{OD}$ ) spectrum of Emodin <b>9</b>     | 24 |
| <b>Figure S42.</b> MS spectrum of Emodin <b>9</b>                                                                       | 24 |
| <b>Figure S43.</b> $^1\text{H}$ NMR (400 MHz, $\text{CDCl}_3$ ) spectrum of Emodin-6,8-dimethyl ether <b>10</b>         | 25 |
| <b>Figure S44.</b> $^{13}\text{C}$ NMR (100 MHz, $\text{CDCl}_3$ ) spectrum of Emodin-6,8-dimethyl ether <b>10</b>      | 25 |
| <b>Figure S45.</b> $^1\text{H}$ NMR (400 MHz, $\text{CDCl}_3$ ) spectrum of 2-Hydroxyemodin-1-methyl ether <b>11</b>    | 26 |
| <b>Figure S46.</b> $^{13}\text{C}$ NMR (400 MHz, $\text{CDCl}_3$ ) spectrum of 2-Hydroxyemodin-1-methyl ether <b>11</b> | 26 |
| <b>Figure S47.</b> $^1\text{H}$ NMR (400 MHz, $\text{CDCl}_3$ ) spectrum of Islandicin <b>12</b>                        | 27 |
| <b>Figure S48.</b> $^{13}\text{C}$ NMR (100 MHz, $\text{CDCl}_3$ ) spectrum of Islandicin <b>12</b>                     | 27 |

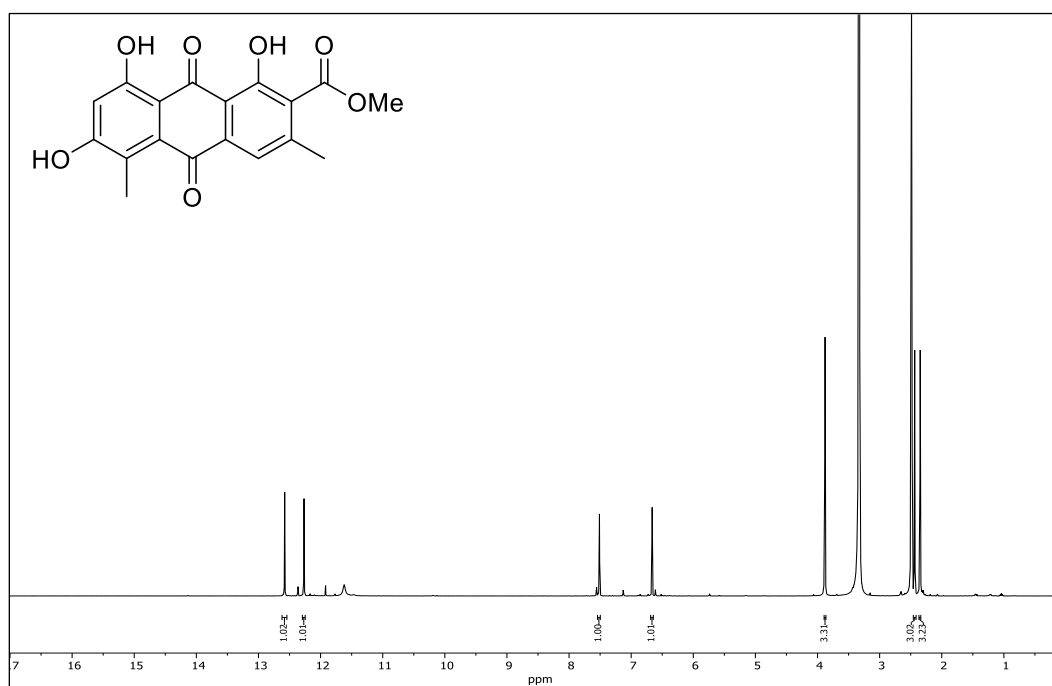

**Figure S1.** <sup>1</sup>H NMR (400 MHz, CDCl<sub>3</sub>) spectrum of compound **1**

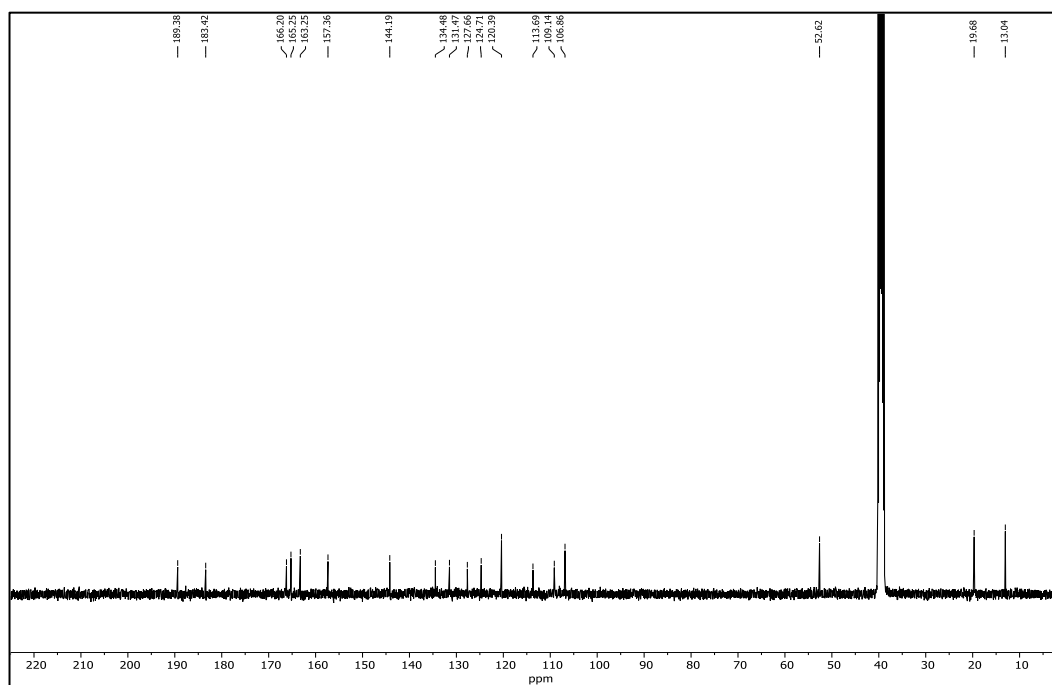

**Figure S2.** <sup>13</sup>C NMR (100 MHz, CDCl<sub>3</sub>) spectrum of compound **1**

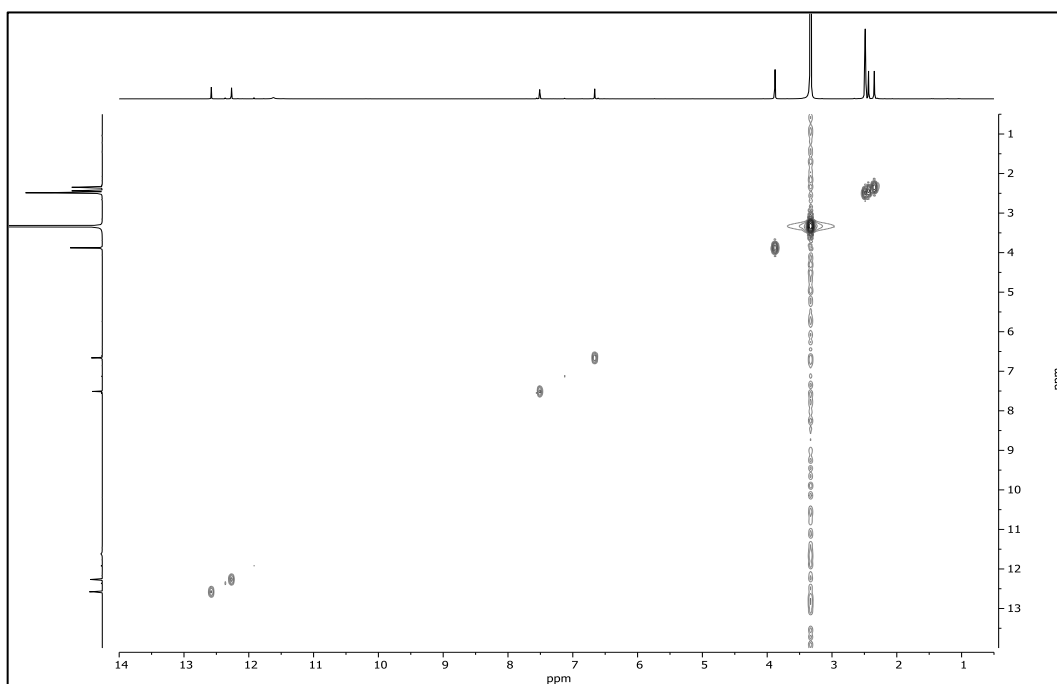

**Figure S3.** COSY (CDCl<sub>3</sub>) spectrum of compound **1**

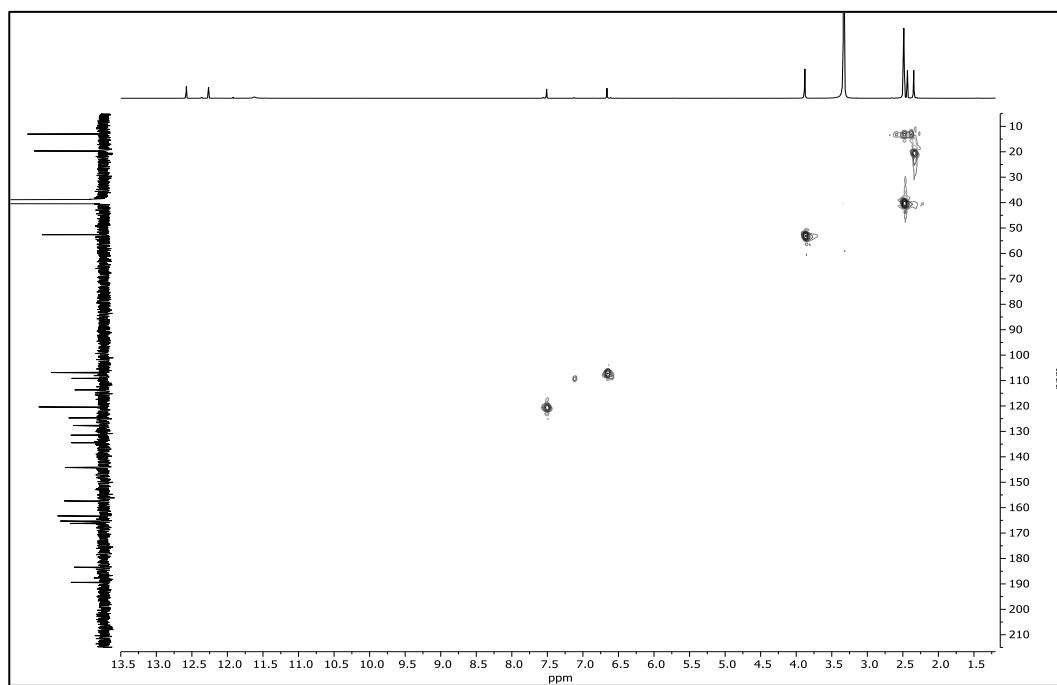

**Figure S4.** HSQC (CDCl<sub>3</sub>) spectrum of compound **1**

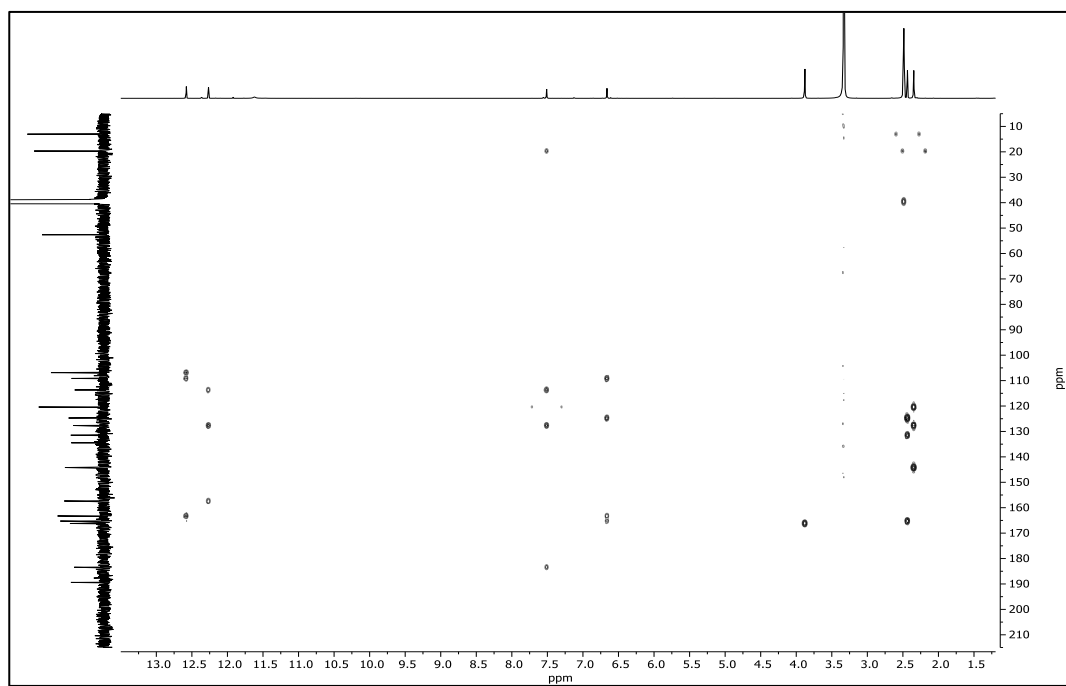

**Figure S5.** HMBC (CDCl<sub>3</sub>) spectrum of compound **1**

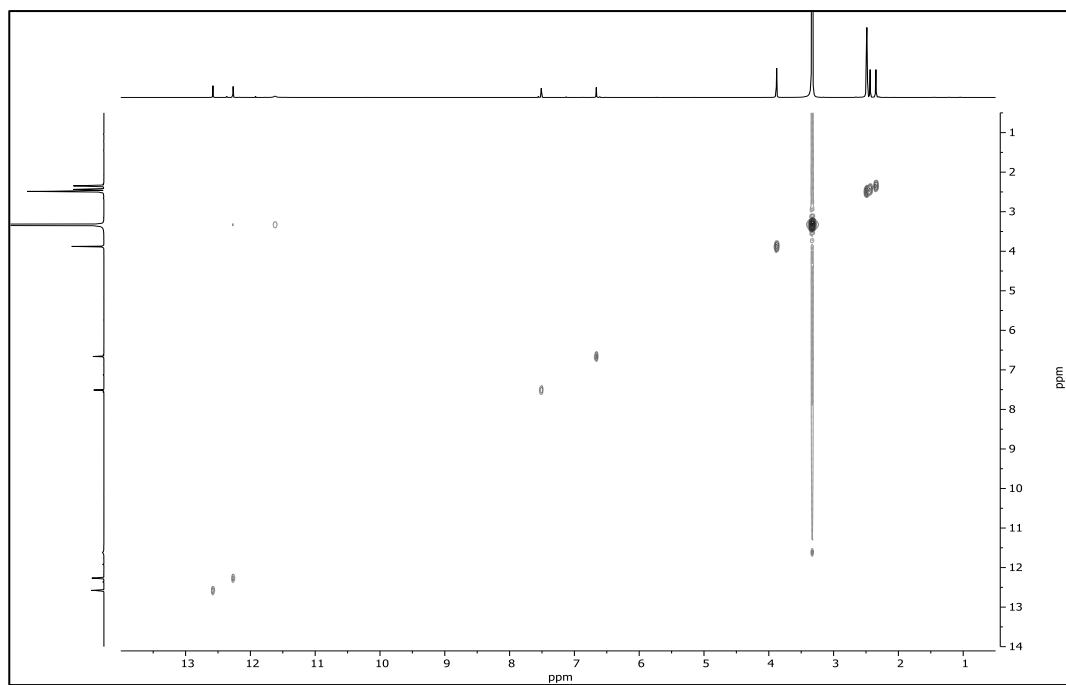

**Figure S6.** NOESY (CDCl<sub>3</sub>) spectrum of compound **1**

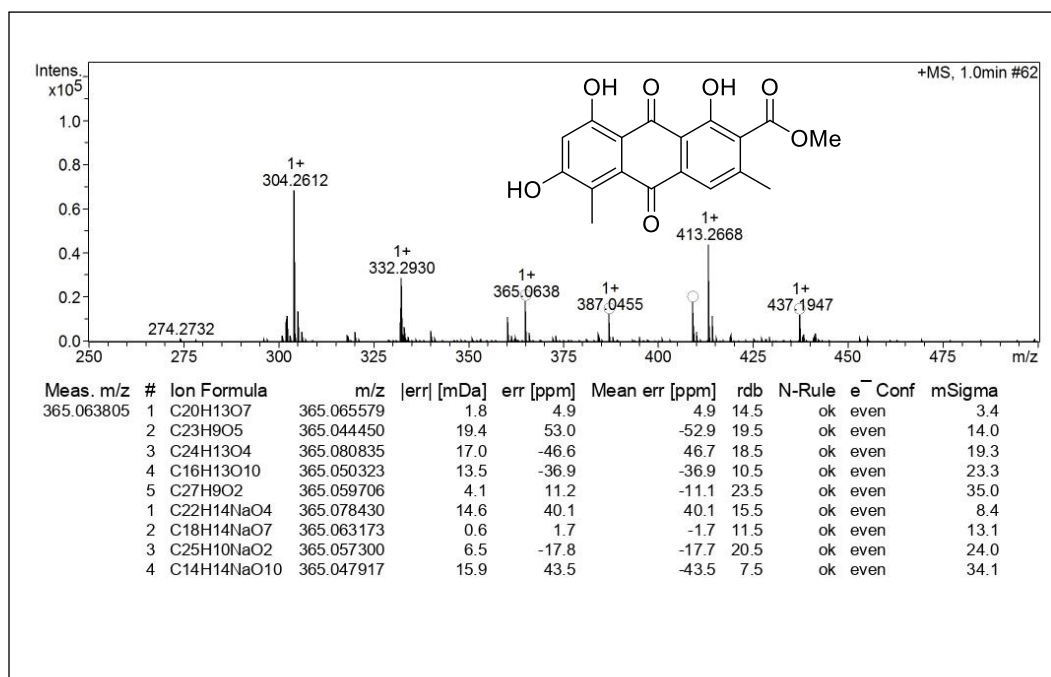

**Figure S7.** MS spectrum of compound **1**

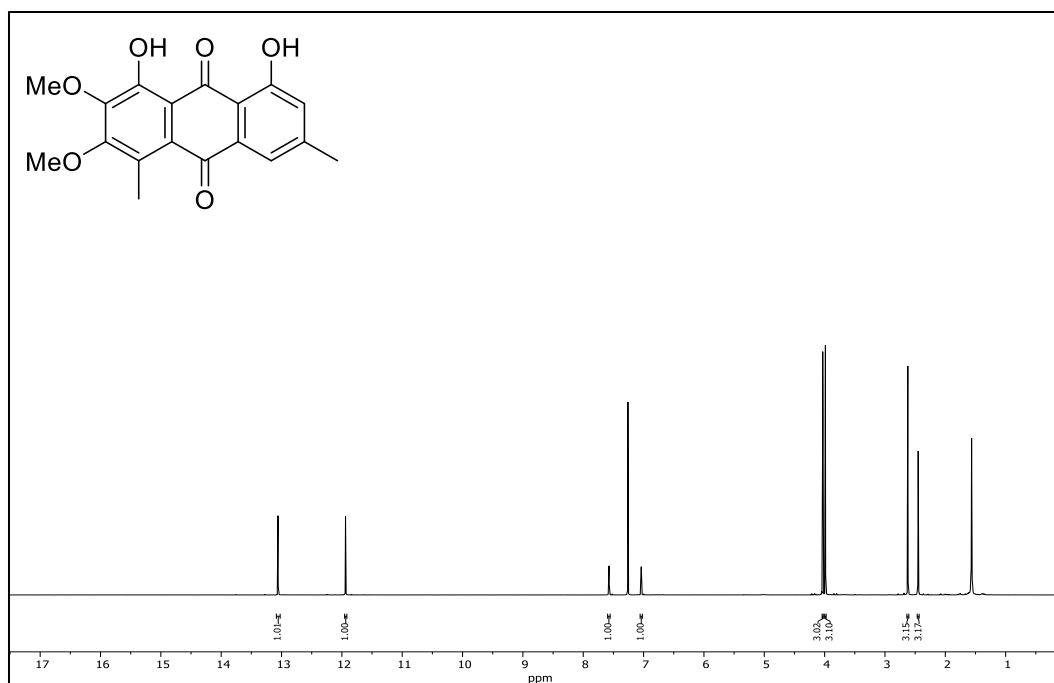

**Figure S8.** <sup>1</sup>H NMR (400 MHz, CDCl<sub>3</sub>) spectrum of compound **2**

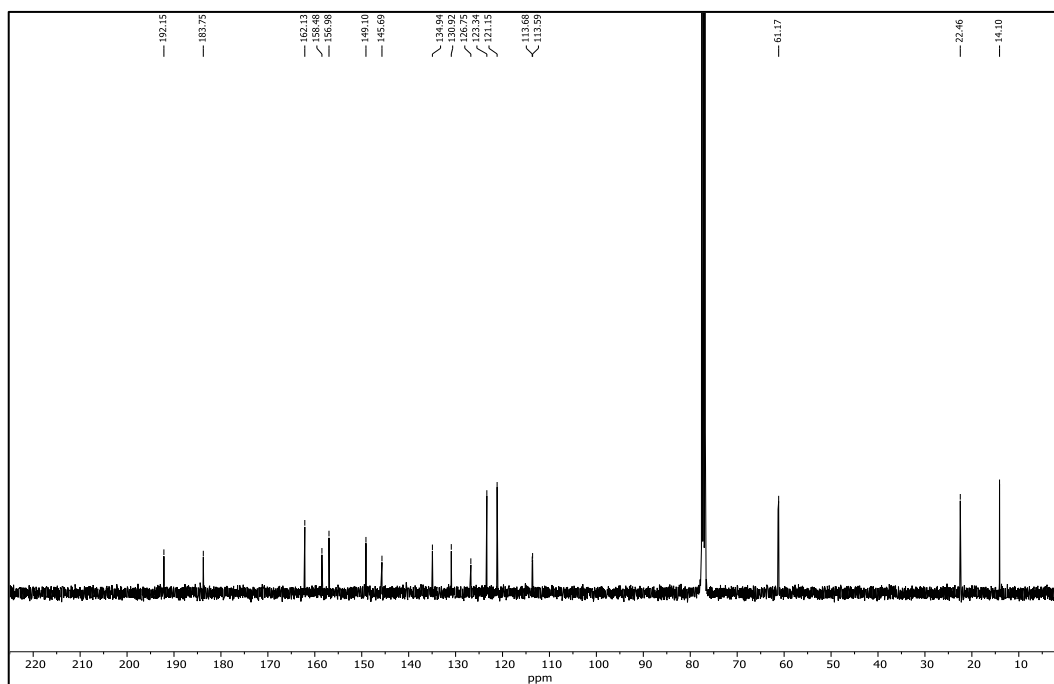

**Figure S9.**  $^{13}\text{C}$  NMR (400 MHz,  $\text{CDCl}_3$ ) spectrum of compound **2**

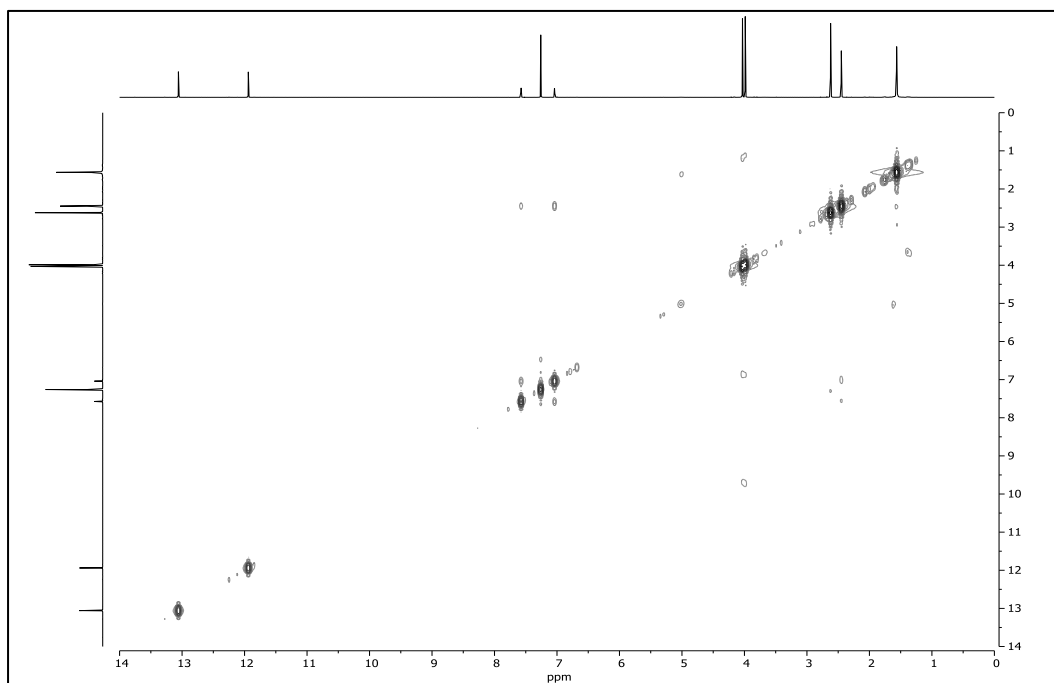

**Figure S10.** COSY ( $\text{CDCl}_3$ ) spectrum of compound **2**



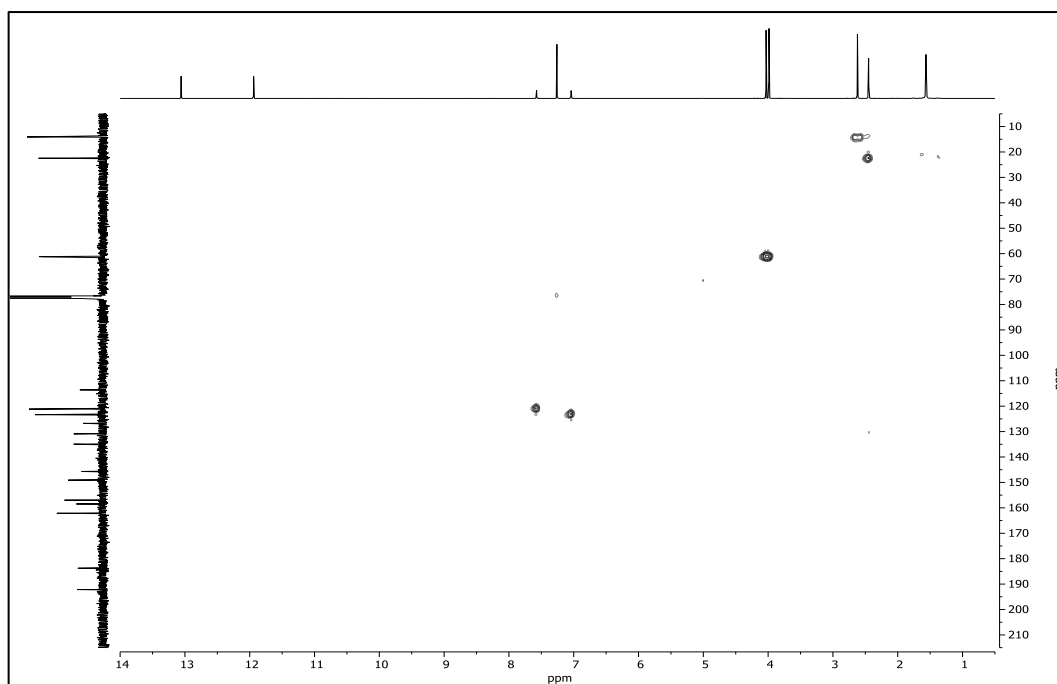

**Figure S11.** HSQC (CDCl<sub>3</sub>) spectrum of compound **2**

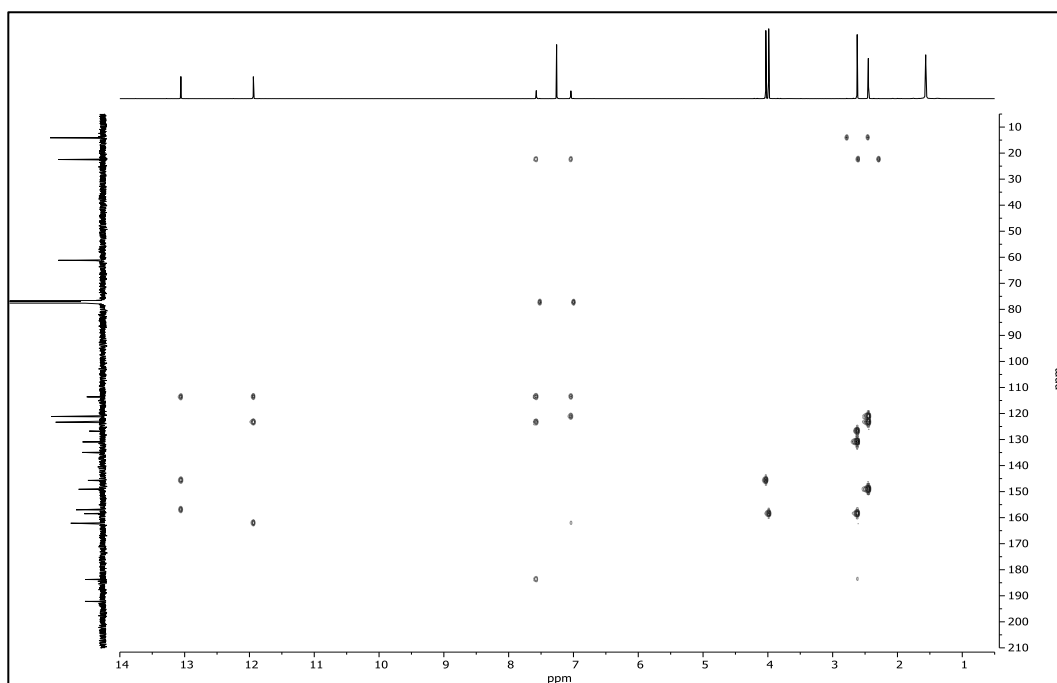

**Figure S12.** HMBC (CDCl<sub>3</sub>) spectrum of compound **2**

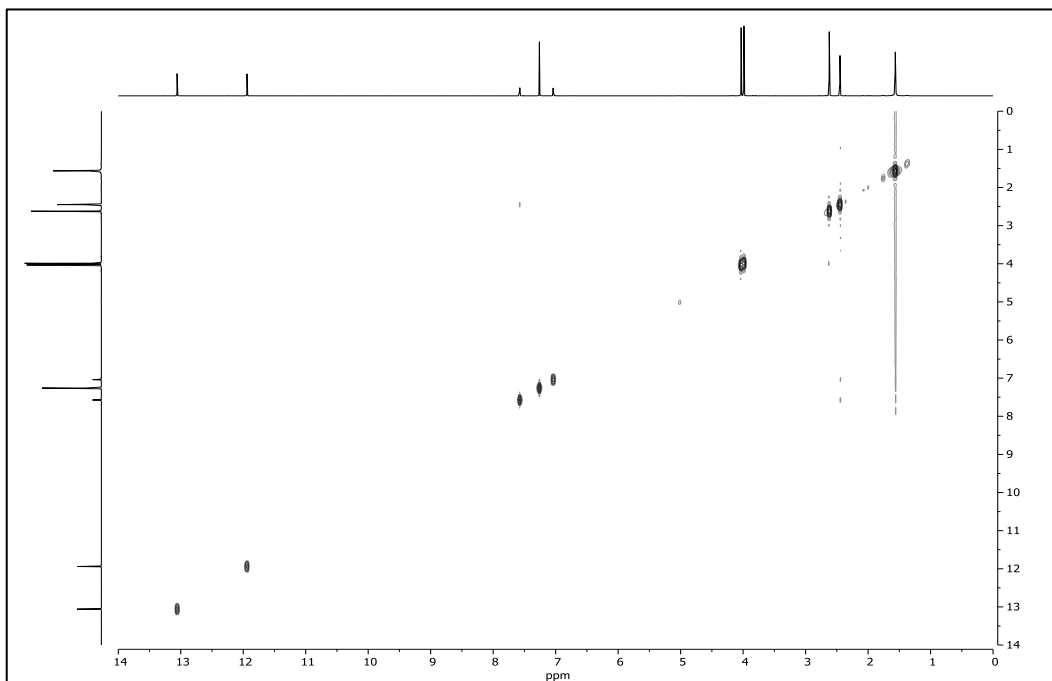

**Figure S13.** NOESY (CDCl<sub>3</sub>) spectrum of compound **2**

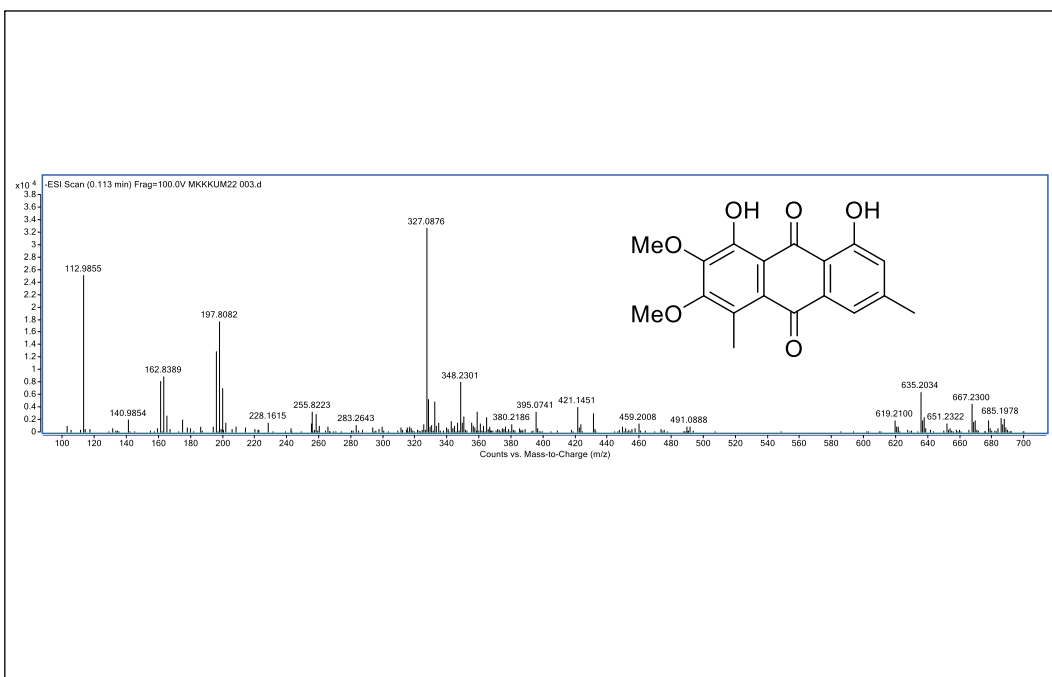

**Figure S14.** MS spectrum of compound **2**

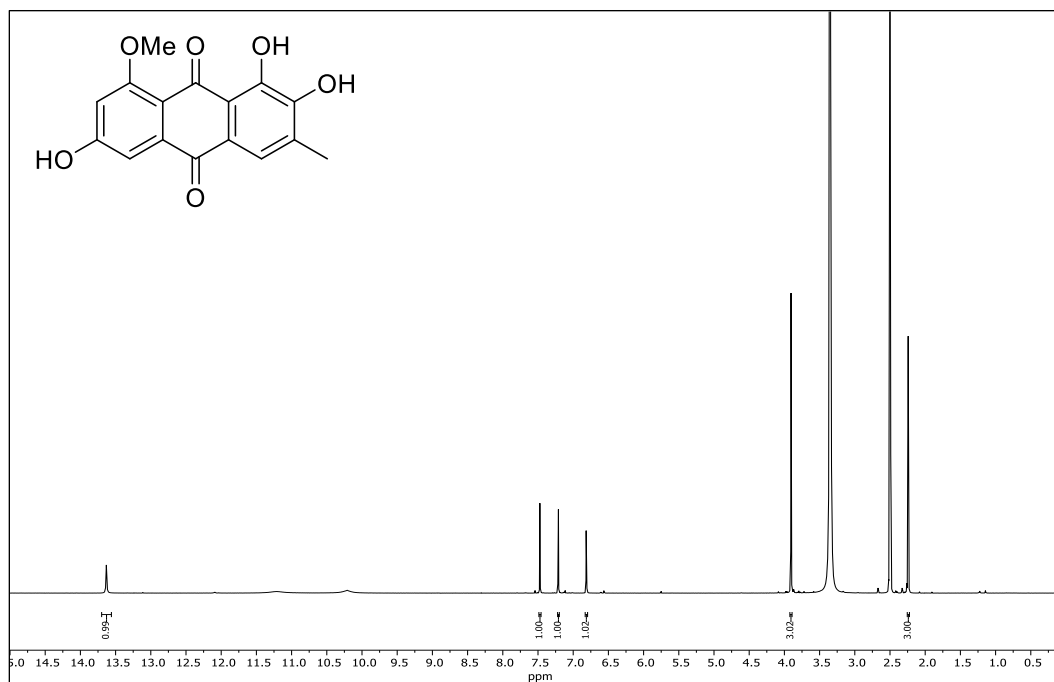

**Figure S15.** <sup>1</sup>H NMR (400 MHz, CDCl<sub>3</sub>) spectrum of compound **3**

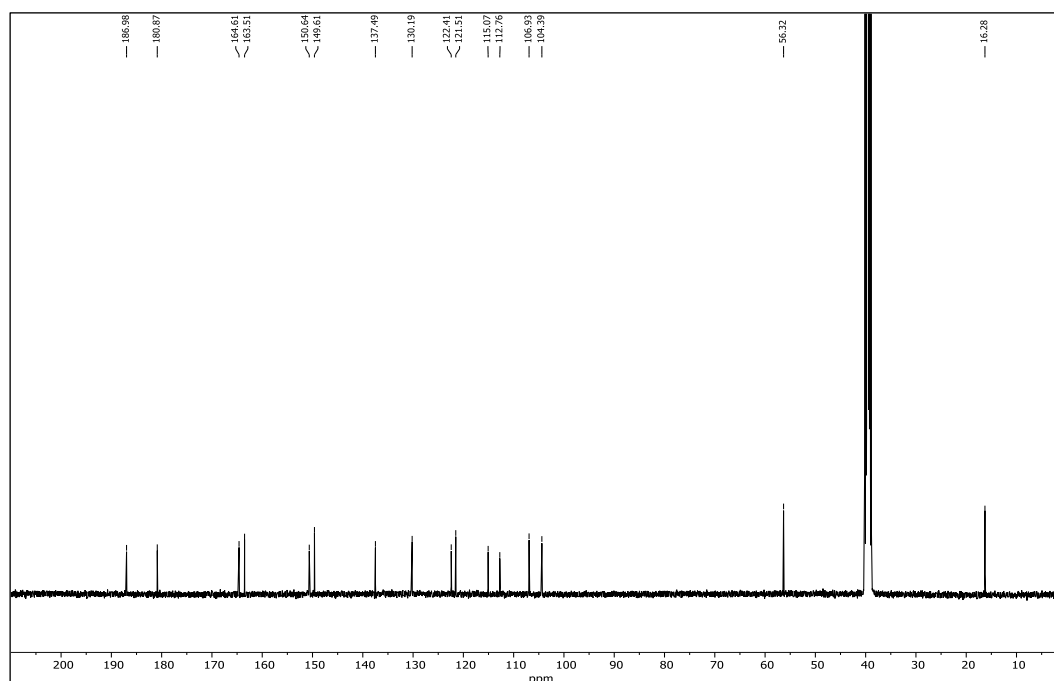

**Figure S16.** <sup>13</sup>C NMR (100 MHz, CDCl<sub>3</sub>) spectrum of compound **3**

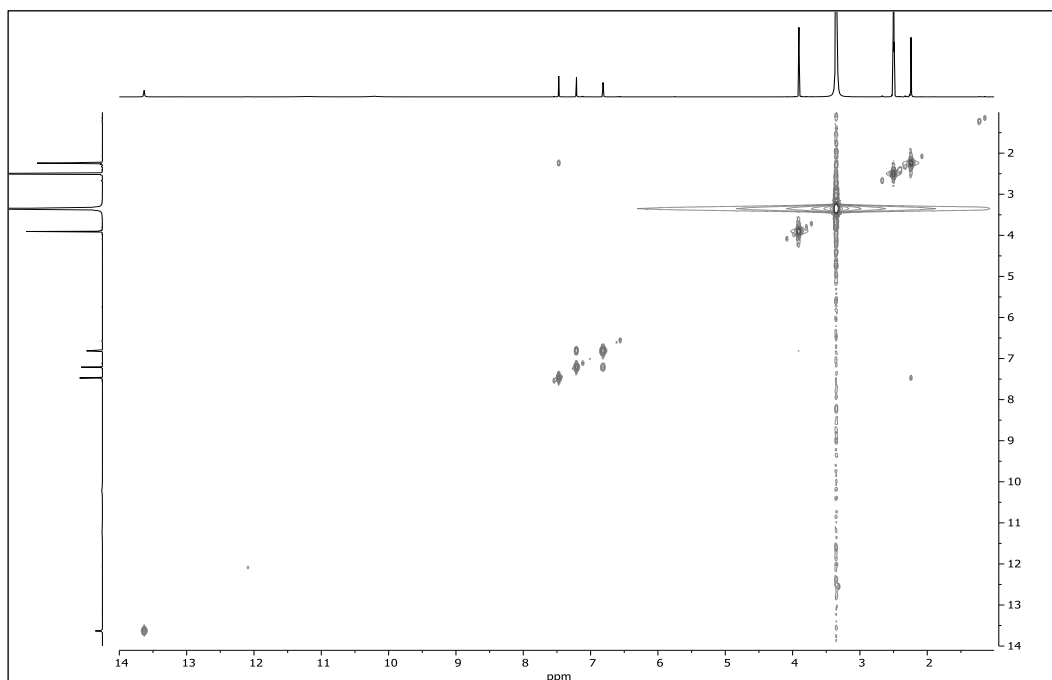

**Figure S17.** COSY (CDCl<sub>3</sub>) spectrum of compound **3**

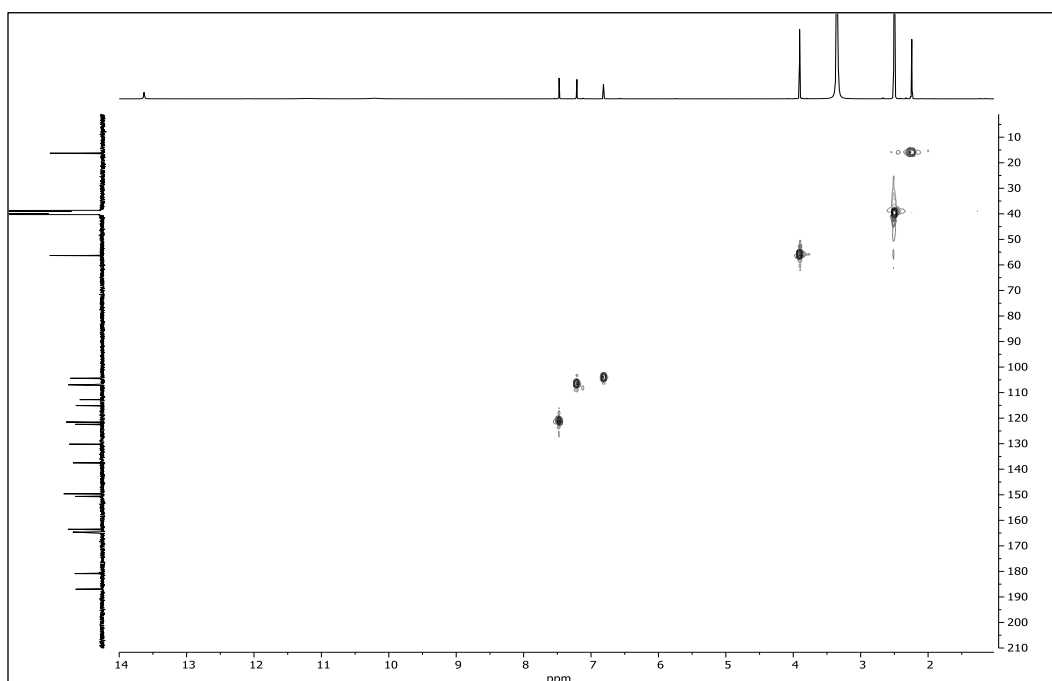

**Figure S18.** HSQC (CDCl<sub>3</sub>) spectrum of compound **3**

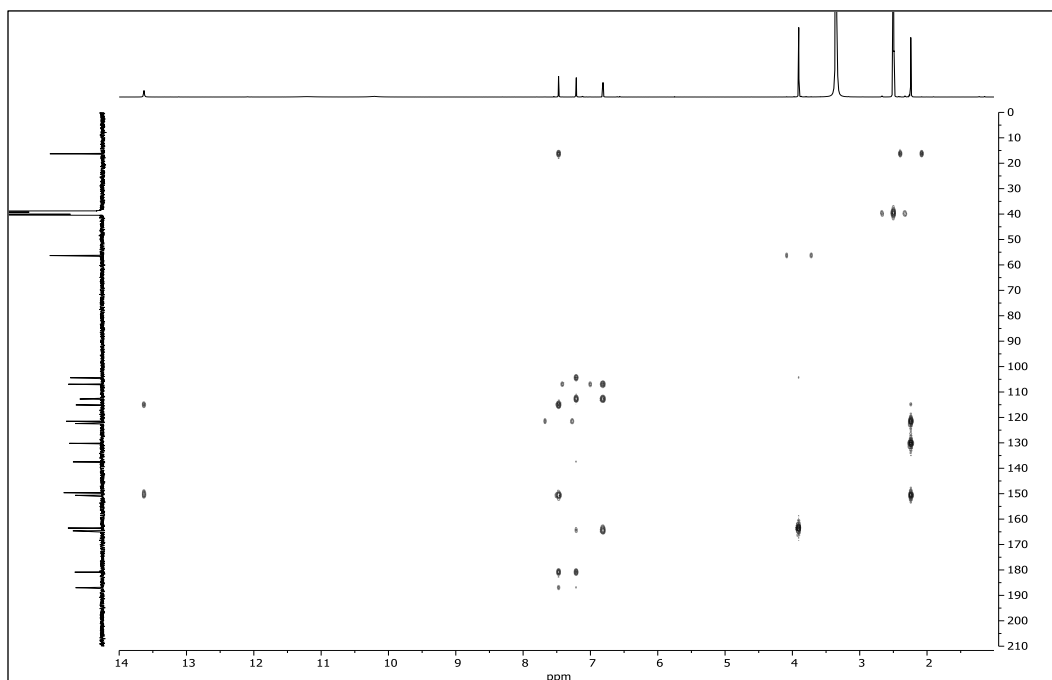

**Figure S19.** HMBC (CDCl<sub>3</sub>) spectrum of compound **3**

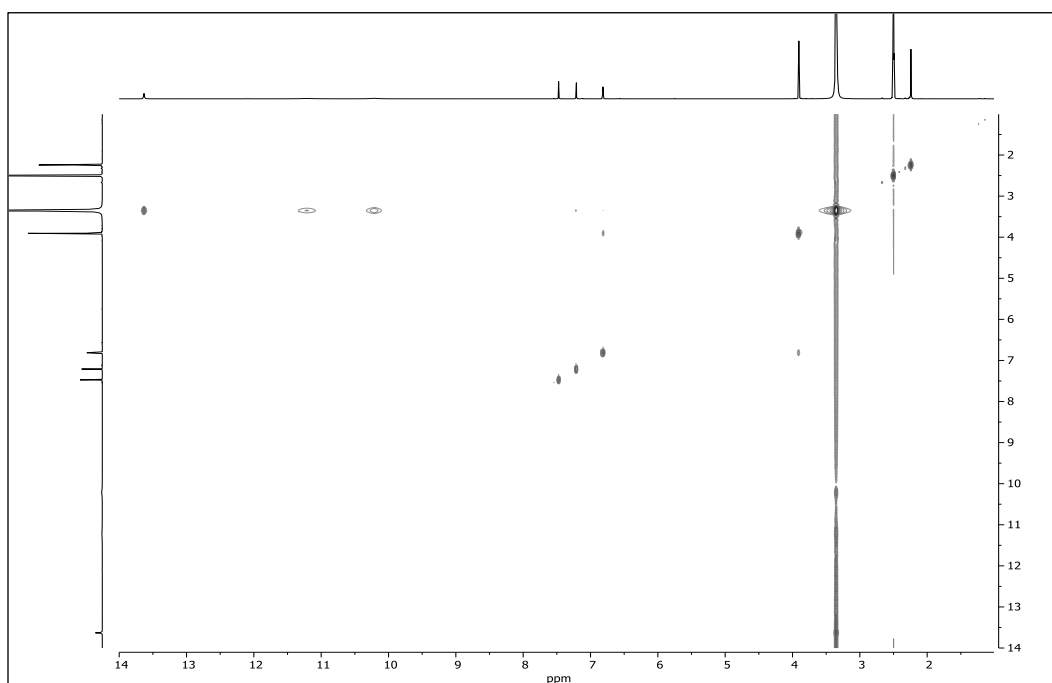

**Figure S20.** NOESY (CDCl<sub>3</sub>) spectrum of compound **3**

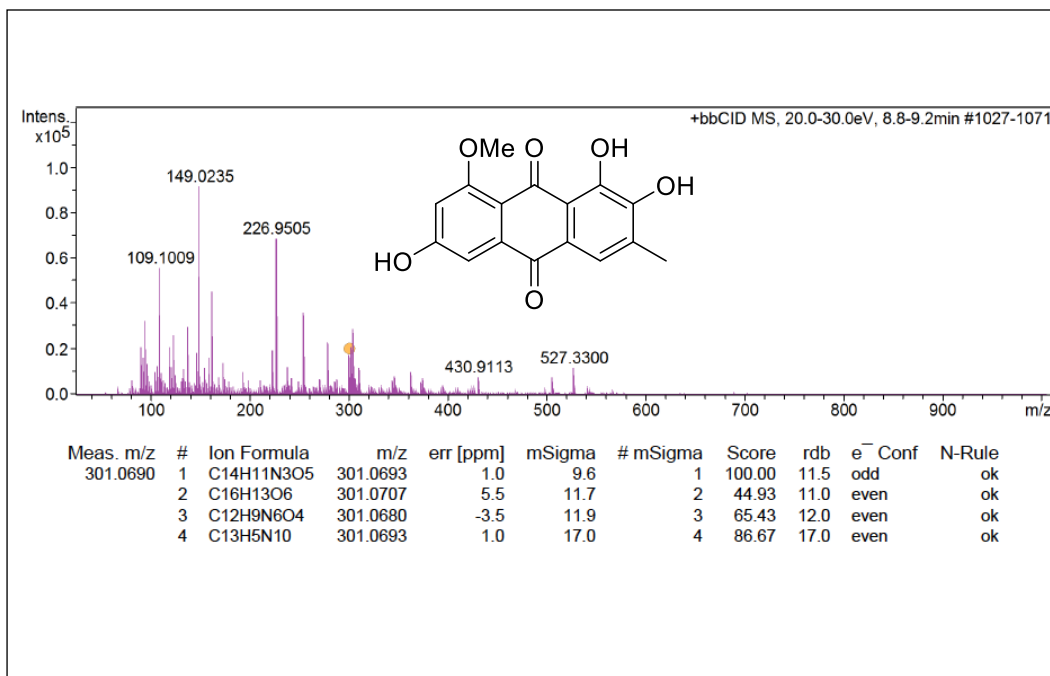

**Figure S21.** MS spectrum of compound **3**

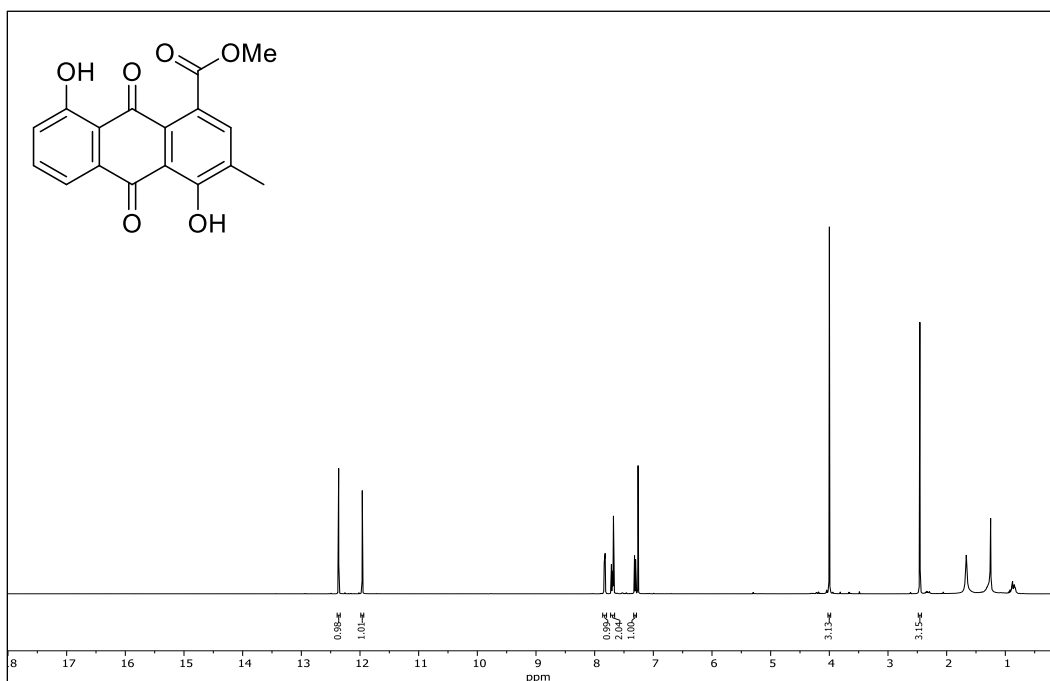

**Figure S22.** <sup>1</sup>H NMR (400 MHz, CDCl<sub>3</sub>) spectrum of compound **4**

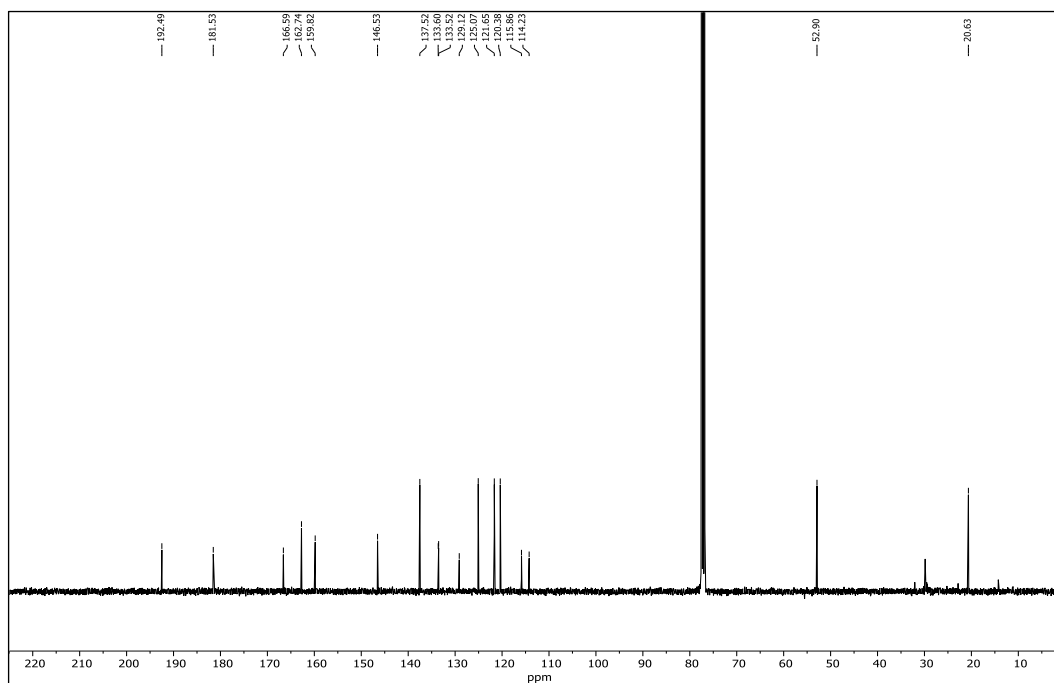

**Figure S23.**  $^{13}\text{C}$  NMR (100 MHz,  $\text{CDCl}_3$ ) spectrum of compound **4**

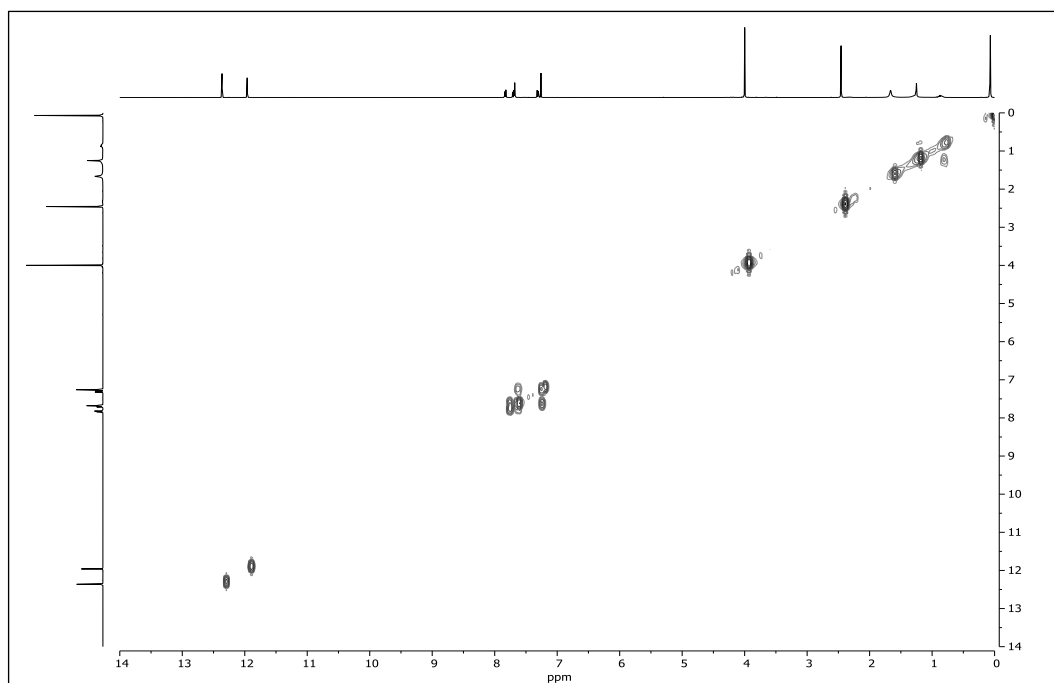

**Figure S24.** COSY ( $\text{CDCl}_3$ ) spectrum of compound **4**

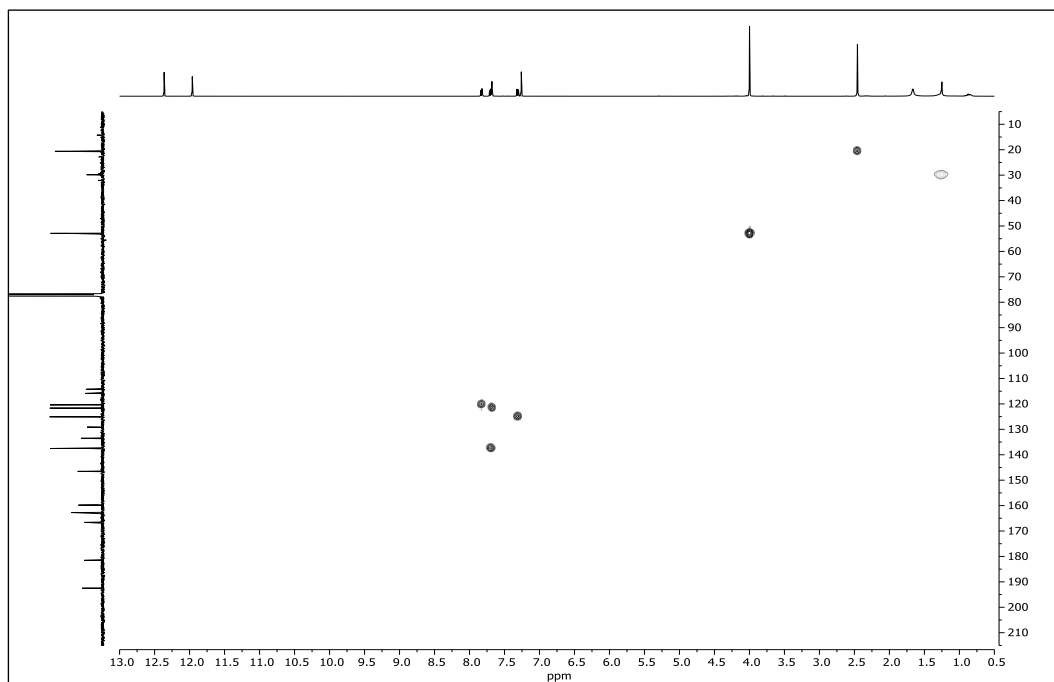

**Figure S25.** HSQC (CDCl<sub>3</sub>) spectrum of compound **4**

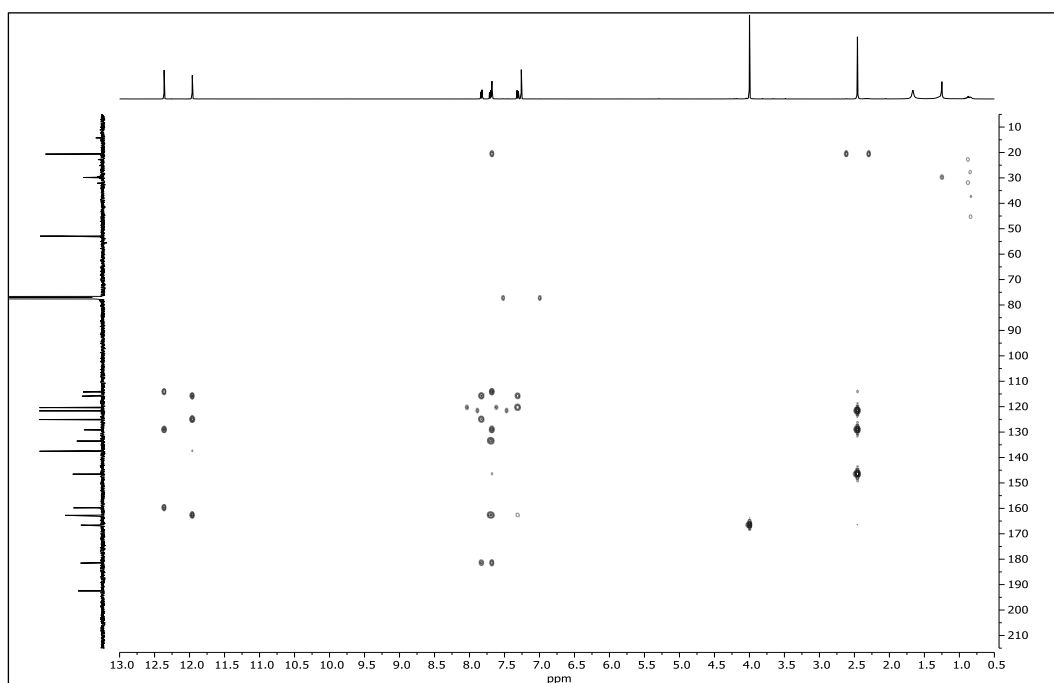

**Figure S26.** HMBC (CDCl<sub>3</sub>) spectrum of compound **4**



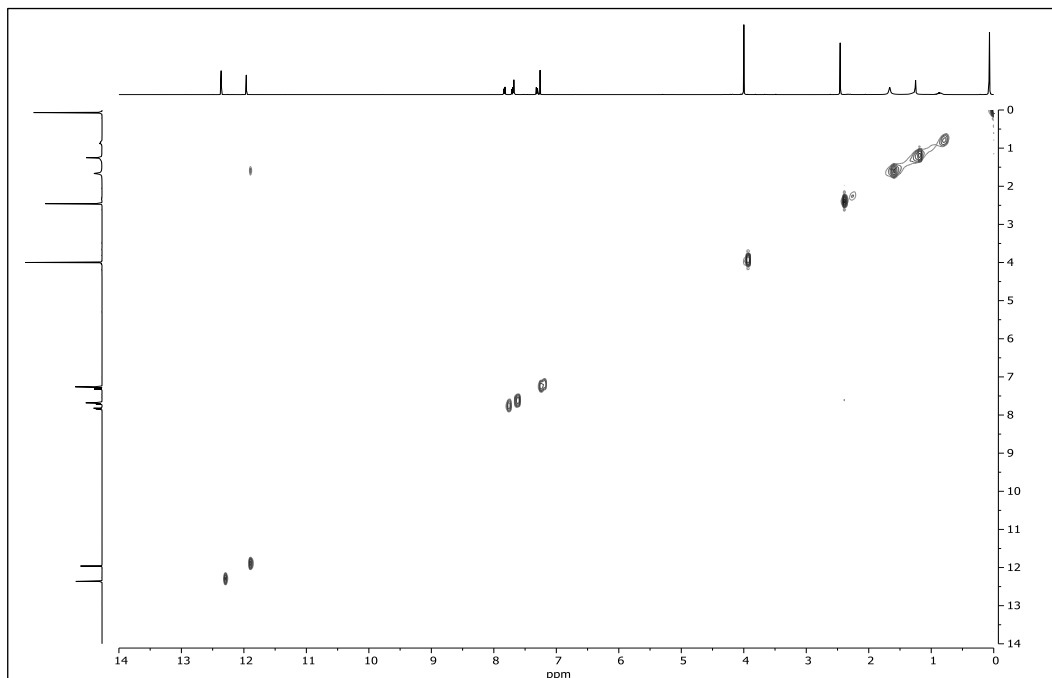

**Figure S27.** NOESY (CDCl<sub>3</sub>) spectrum of compound **4**

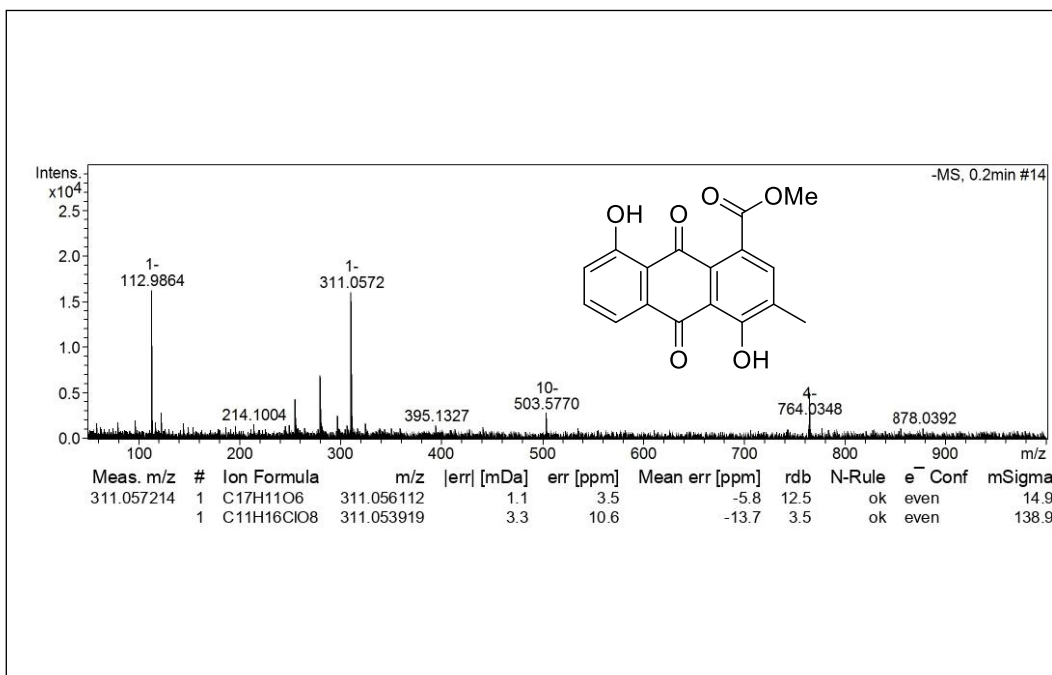

**Figure S28.** MS spectrum of compound **4**

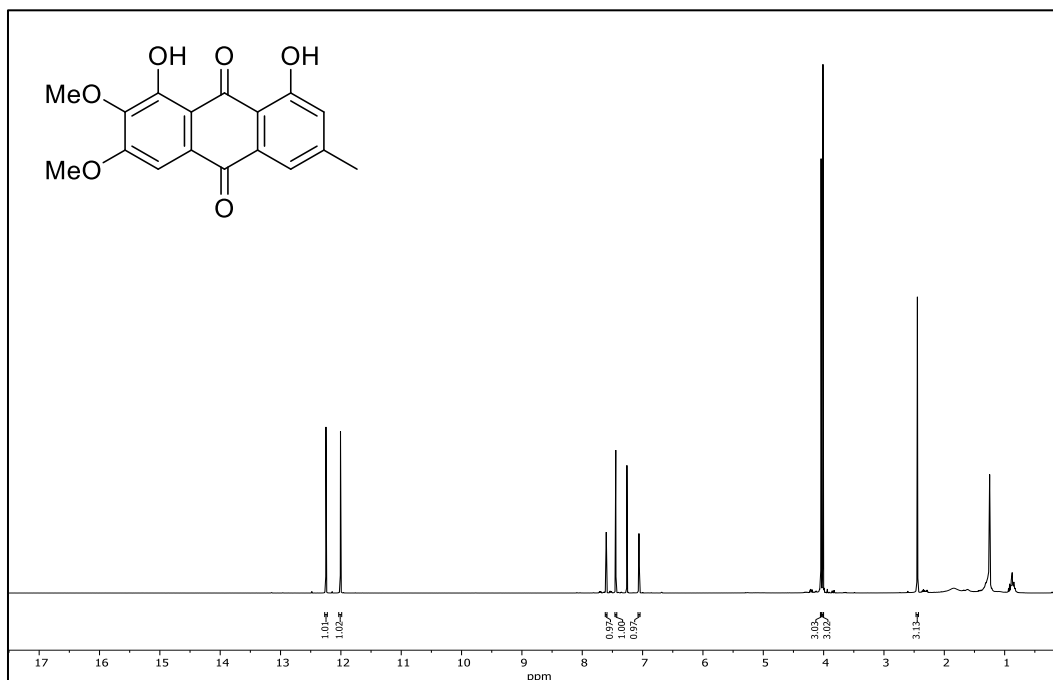

**Figure S29.** <sup>1</sup>H NMR (400 MHz, CDCl<sub>3</sub>) spectrum of 7-Methoxyphyscion **5**

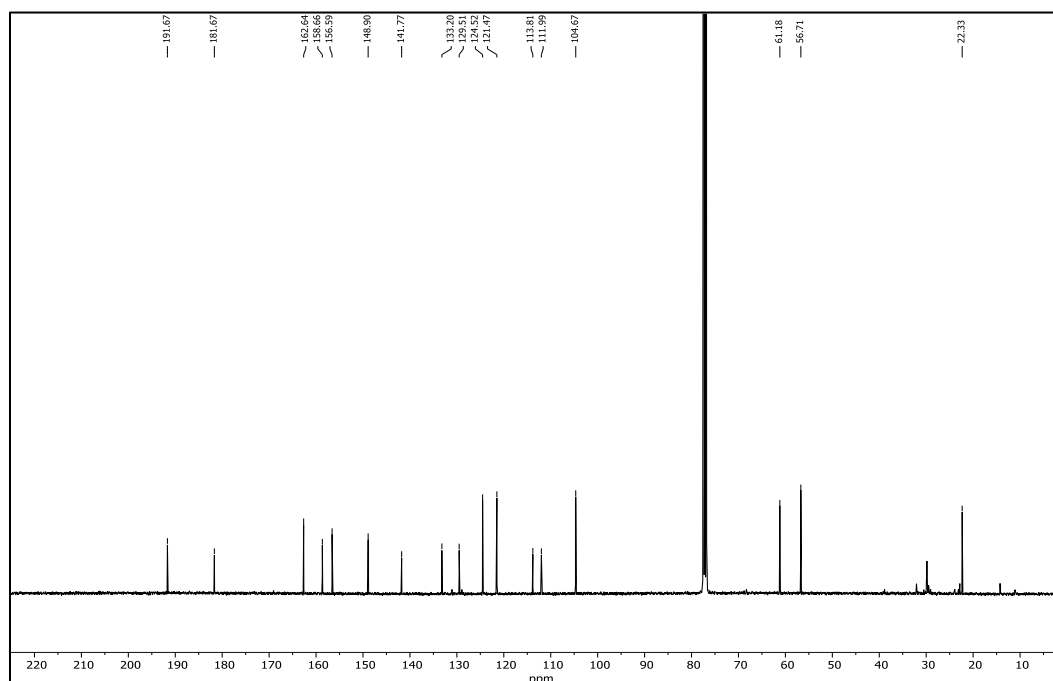

**Figure S30.** <sup>13</sup>C NMR (100 MHz, CDCl<sub>3</sub>) spectrum of 7-Methoxyphyscion **5**

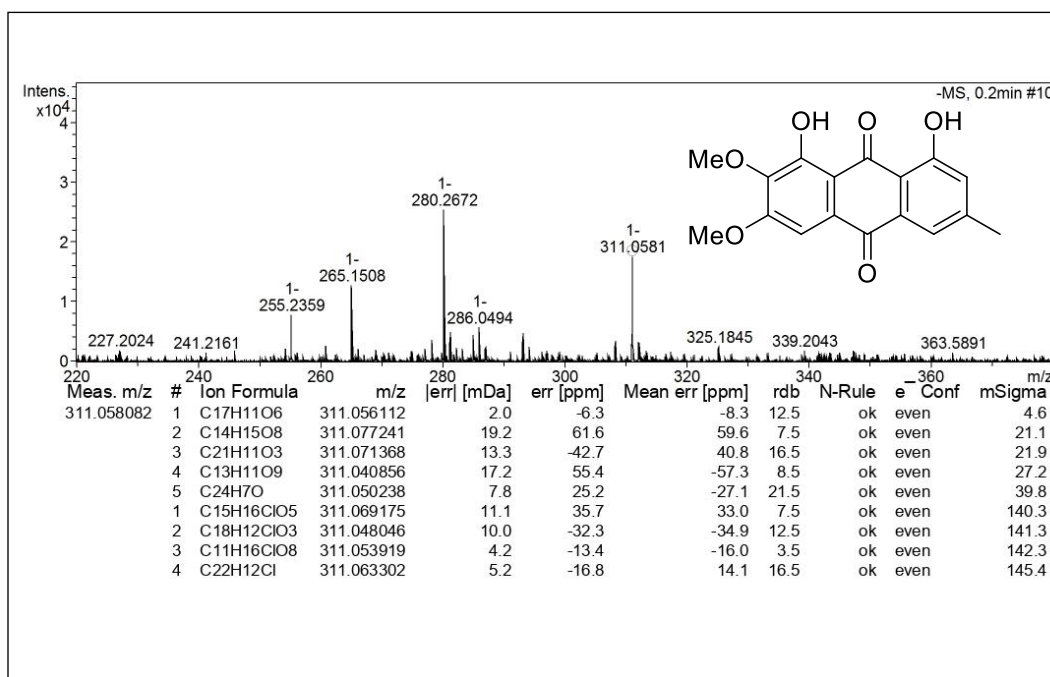

**Figure S31.** MS spectrum of 7-Methoxyphyscion **5**

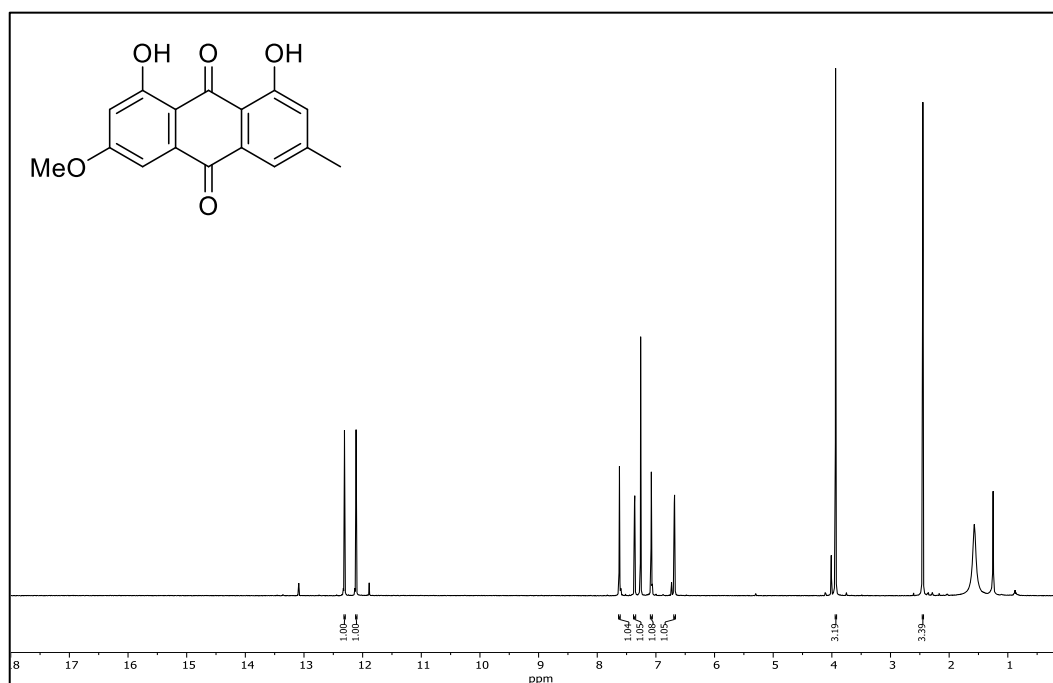

**Figure S32**  $^1\text{H}$  NMR (400 MHz,  $\text{CDCl}_3$ ) spectrum of Physcion **6**

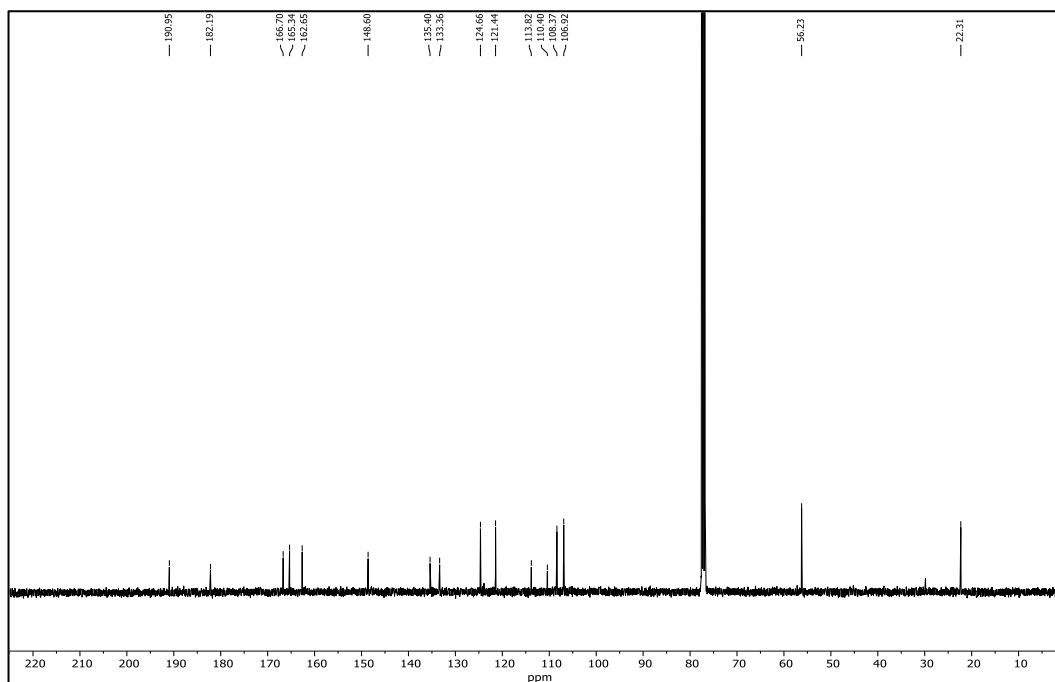

**Figure S33**  $^{13}\text{C}$  NMR (100 MHz,  $\text{CDCl}_3$ ) spectrum of Physcion **6**

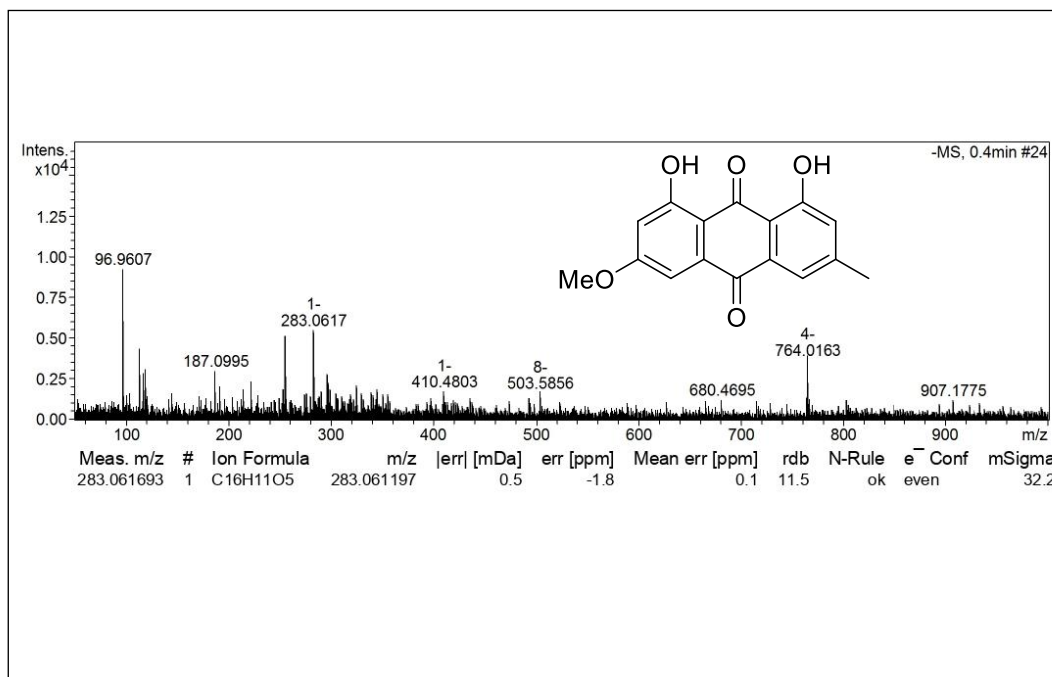

**Figure S34.** MS spectrum of Physcion **6**

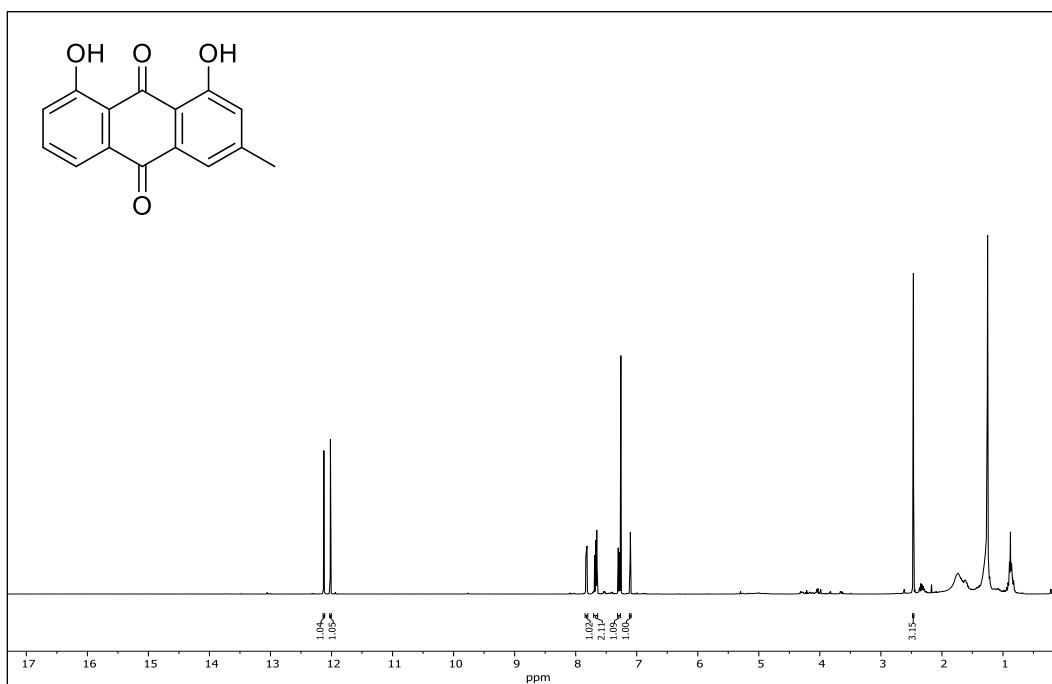

**Figure S35.** <sup>1</sup>H NMR (400 MHz, CDCl<sub>3</sub>) spectrum of Chrysophanol **7**

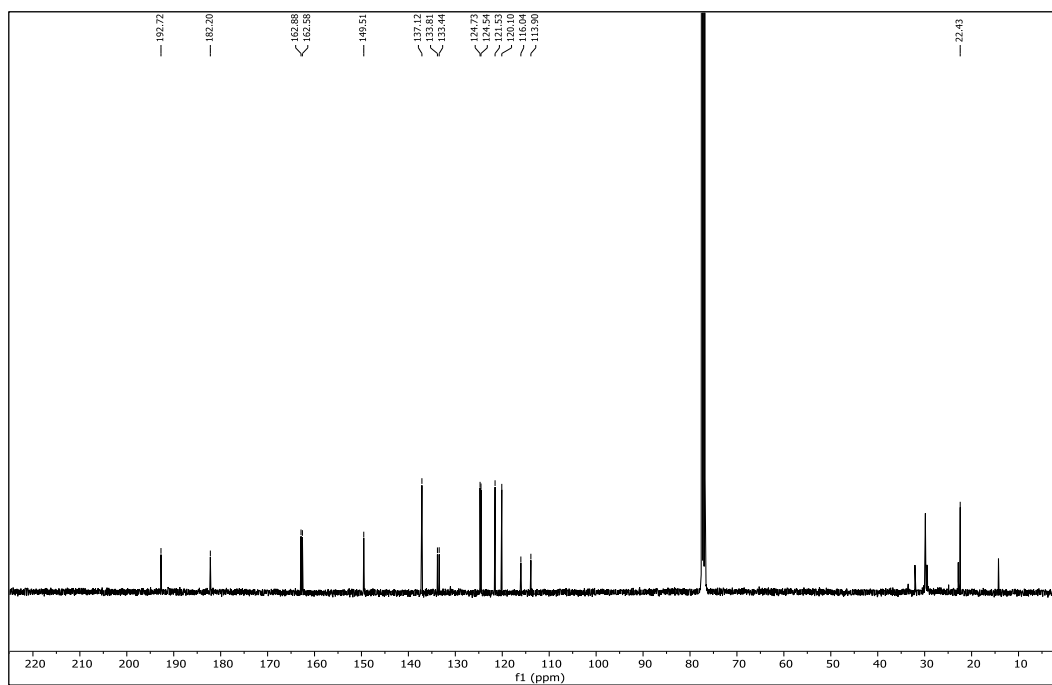

**Figure S36.** <sup>13</sup>C NMR (100 MHz, CDCl<sub>3</sub>) spectrum of Chrysophanol **7**

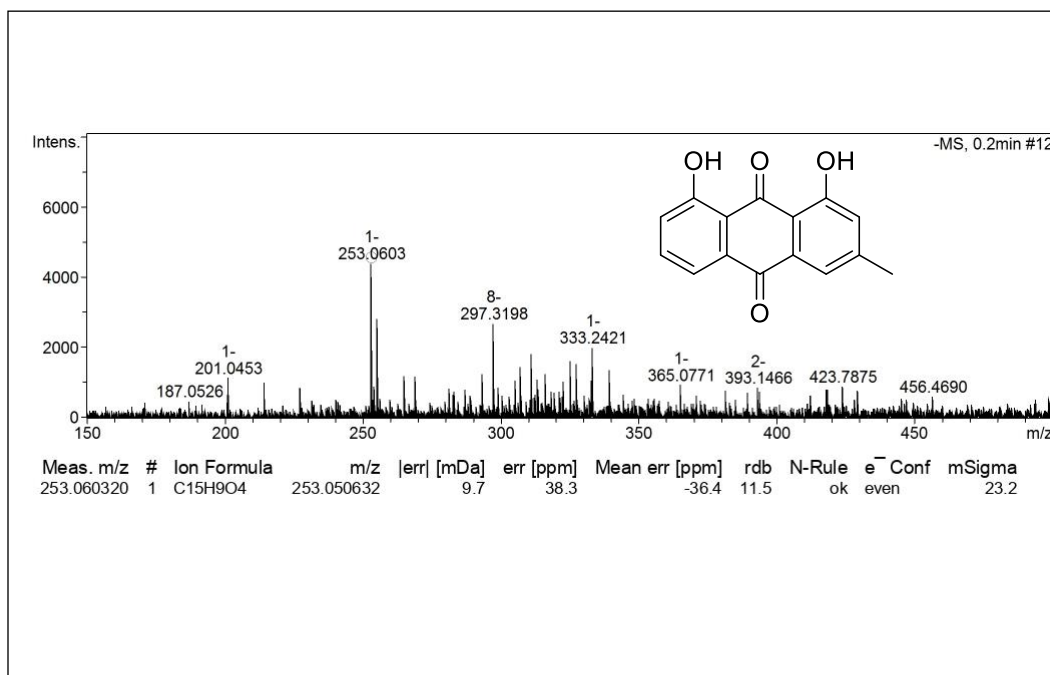

**Figure S37.** MS spectrum of Chrysophanol **7**

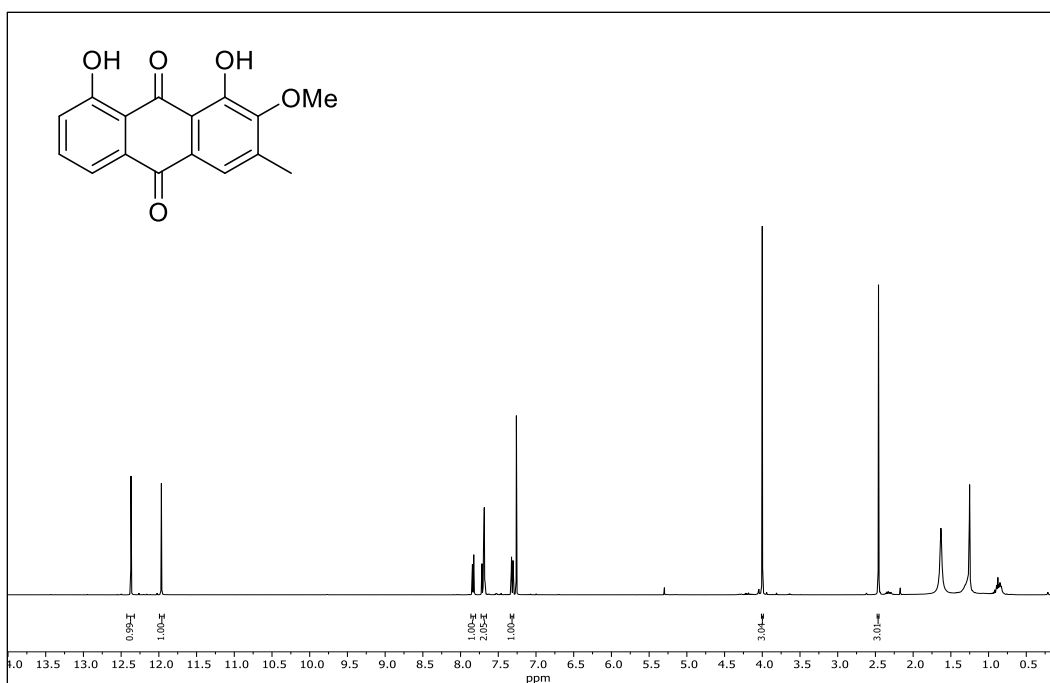

**Figure S38.** <sup>1</sup>H NMR (400 MHz, CDCl<sub>3</sub>) spectrum of 2-Methoxychrysophanol **8**

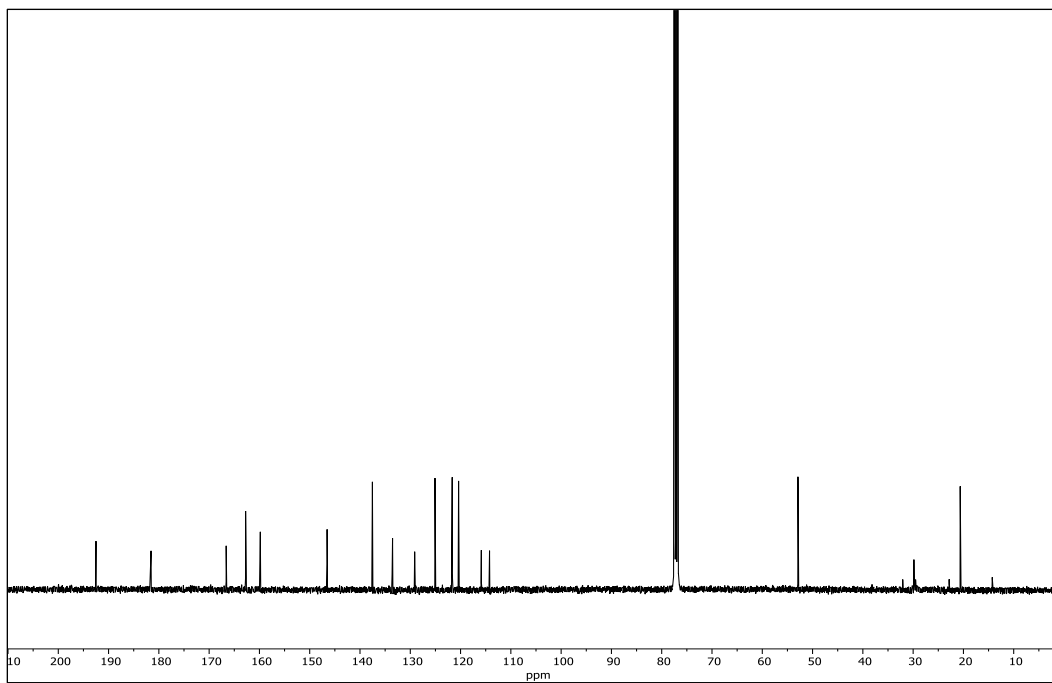

**Figure S39.**  $^{13}\text{C}$  NMR (100 MHz,  $\text{CDCl}_3$ ) spectrum of 2-Methoxychrysophanol **8**

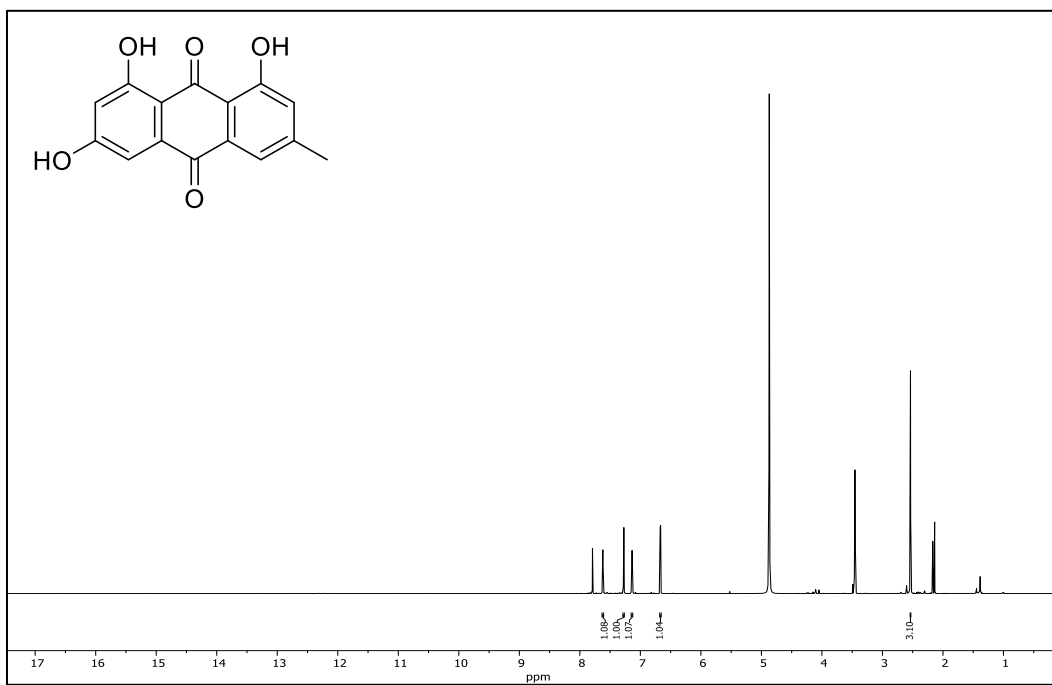

**Figure S40.**  $^1\text{H}$  NMR (400 MHz,  $\text{CDCl}_3 + \text{CD}_3\text{OD}$ ) spectrum of Emodin **9**

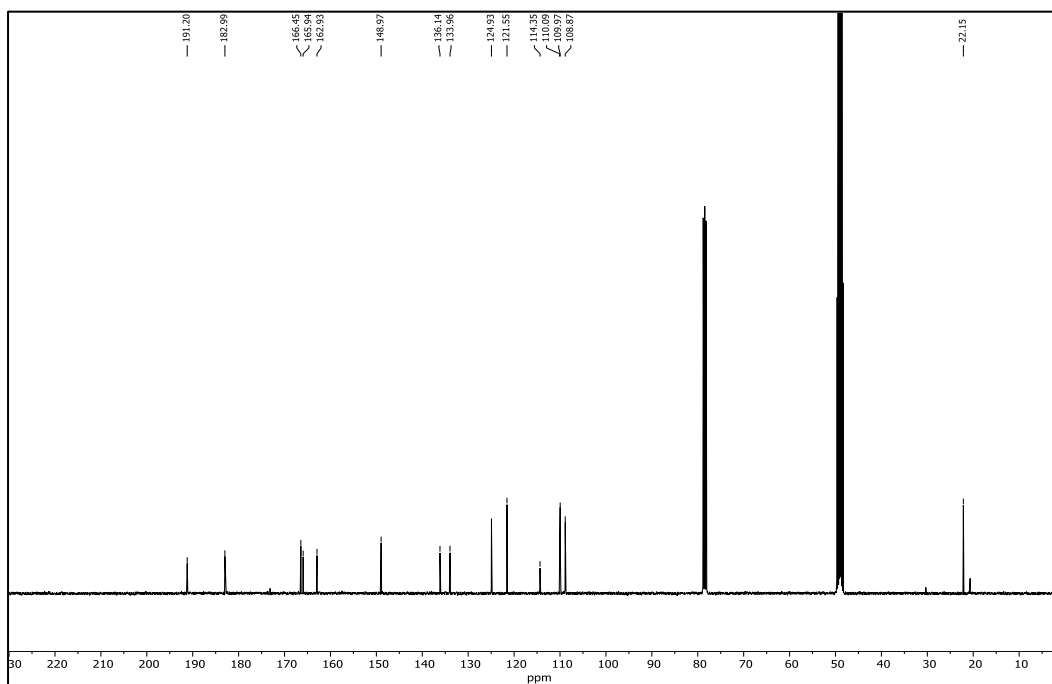

**Figure S41.**  $^{13}\text{C}$  NMR (100 MHz,  $\text{CDCl}_3+\text{CD}_3\text{OD}$ ) spectrum of Emodin **9**

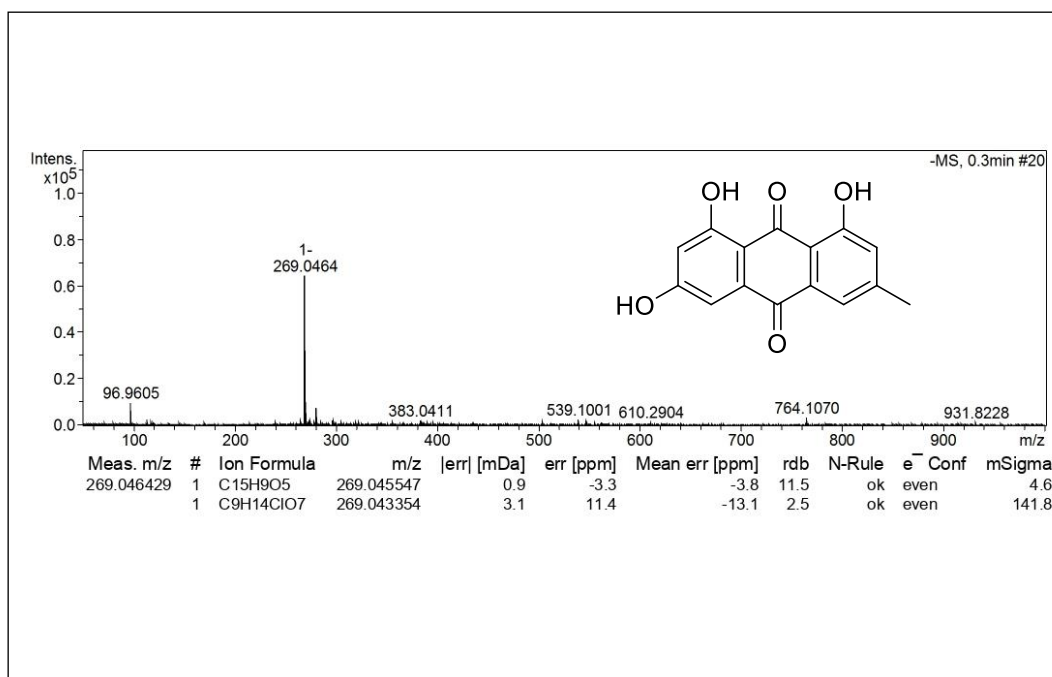

**Figure S42.** MS spectrum of Emodin **9**



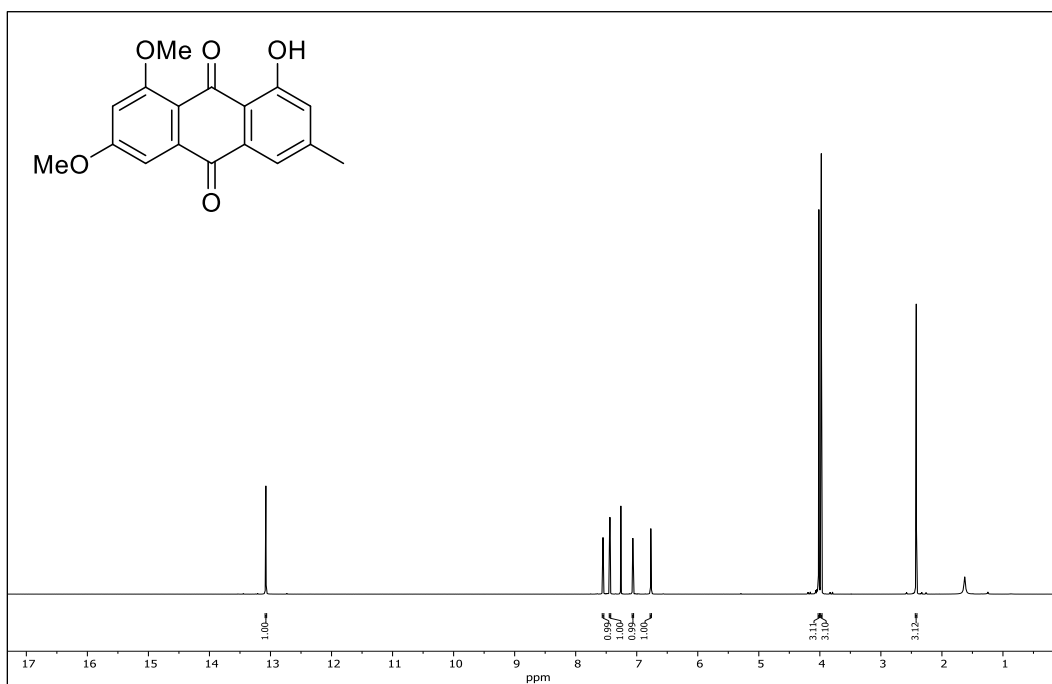

**Figure S43.** <sup>1</sup>H NMR (400 MHz, CDCl<sub>3</sub>) spectrum of Emodin-6,8-dimethyl ether **10**

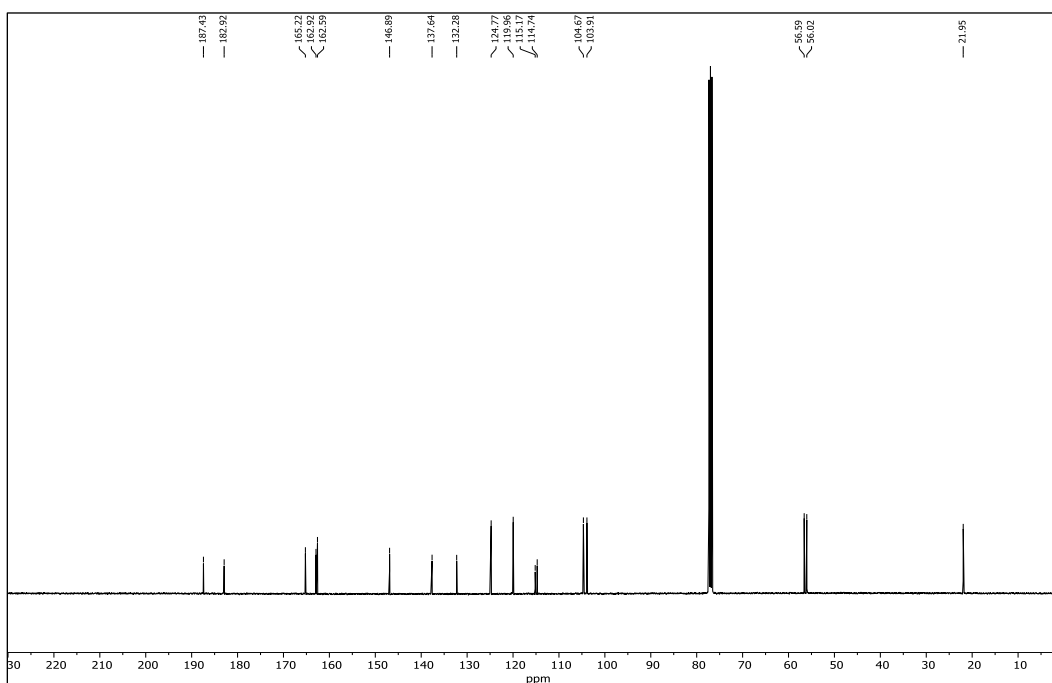

**Figure S44.** <sup>13</sup>C NMR (100 MHz, CDCl<sub>3</sub>) spectrum of Emodin-6,8-dimethyl ether **10**

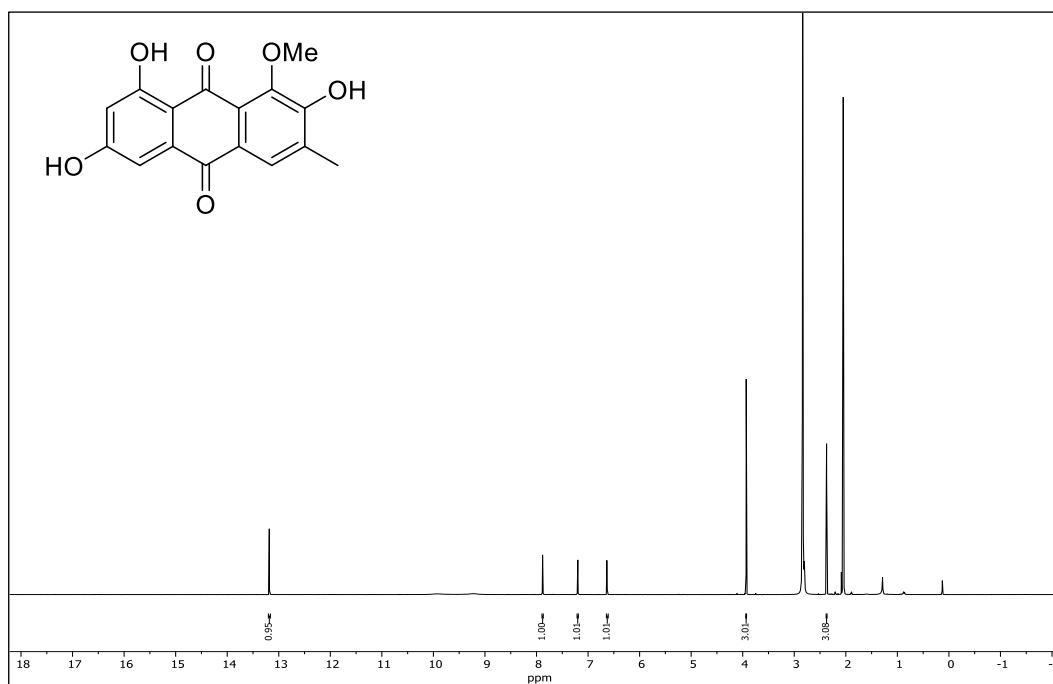

**Figure S45.** <sup>1</sup>H NMR (400 MHz, CDCl<sub>3</sub>) spectrum of 2-Hydroxyemodin-1-methyl ether **11**

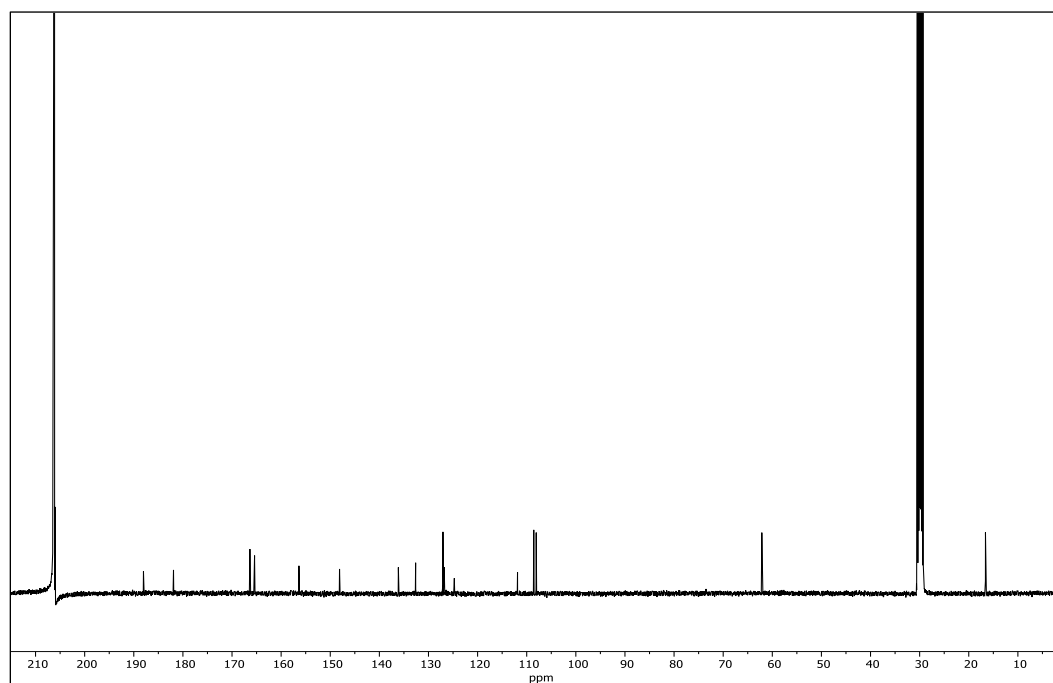

**Figure S46.** <sup>13</sup>C NMR (400 MHz, CDCl<sub>3</sub>) spectrum of 2-Hydroxyemodin-1-methyl ether **11**

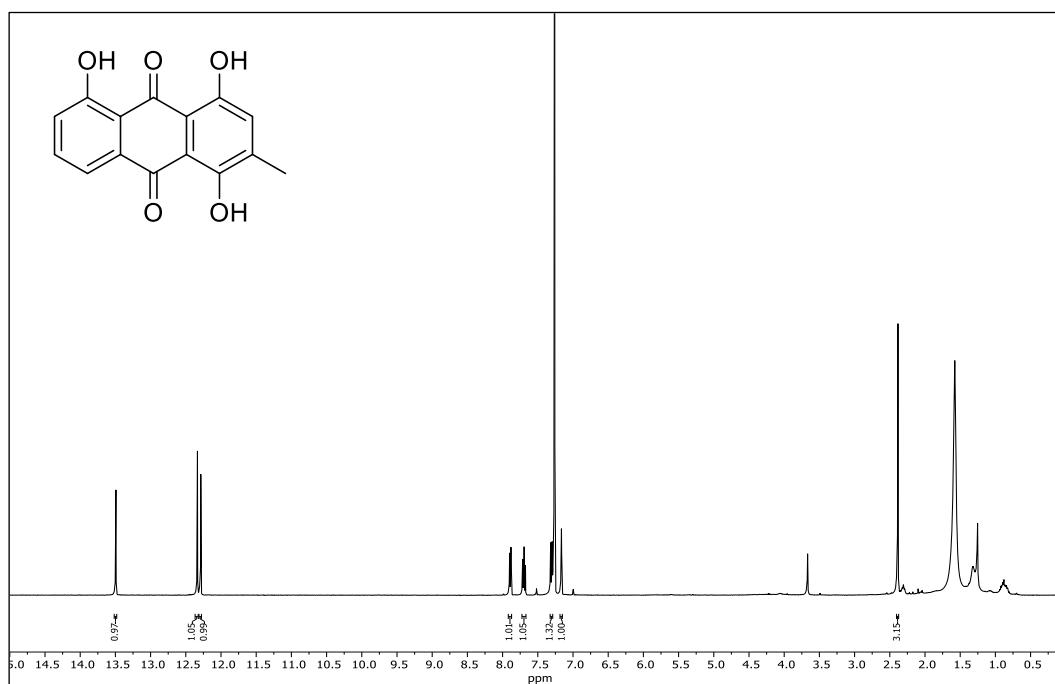

**Figure S47.** <sup>1</sup>H NMR (400 MHz, CDCl<sub>3</sub>) spectrum of Islandicin **12**

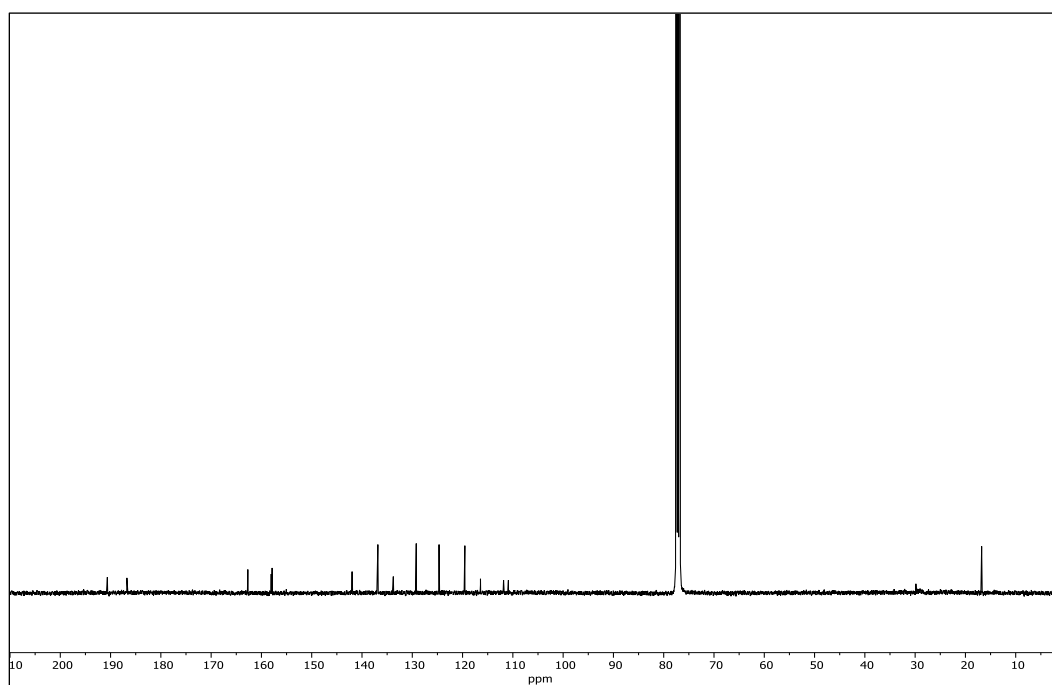

**Figure S48.** <sup>13</sup>C NMR (100 MHz, CDCl<sub>3</sub>) spectrum of Islandicin **12**
